1 **A dCas9/CRISPR-based targeting system identifies a central role for Ctf19 in kinetochore-**  
2 **derived suppression of meiotic recombination**

3

4 Lisa-Marie Kuhl <sup>1</sup>, Vasso Makrantonis <sup>2</sup>, Sarah Recknagel <sup>1</sup>, Animish N. Vaze <sup>1</sup>, Adele L. Marston  
5 <sup>2</sup> and Gerben Vader <sup>1,3,\*</sup>

6

7 <sup>1</sup> Department of Mechanistic Cell Biology, Max Planck Institute of Molecular Physiology, Otto-  
8 Hahn-Strasse 11, 44227 Dortmund, Germany

9

10 <sup>2</sup> The Wellcome Centre for Cell Biology, Institute of Cell Biology, School of Biological  
11 Sciences, University of Edinburgh, Edinburgh, UK

12

13 <sup>3</sup> International Max Planck Research School (IMPRS) in Chemical and Molecular Biology,  
14 Max Planck Institute of Molecular Physiology, Otto-Hahn-Strasse 11, 44227, Dortmund,  
15 Germany

16

17

18

19 \*correspondence: [gerben.vader@mpi-dortmund.mpg.de](mailto:gerben.vader@mpi-dortmund.mpg.de)

20

21 ORCID: G.V.: 0000-0001-5729-0991

22 V.M.: 0000-0003-0668-6157

23 A.L.M.: 0000-0002-3596-9407

24

25

26

27 **Abstract**

28 **In meiosis, crossover formation between homologous chromosomes is essential for**  
29 **faithful segregation. However, improperly controlled or placed meiotic recombination can**  
30 **have catastrophic consequences on genome stability. Specifically, within centromeres and**  
31 **surrounding regions (*i.e.* pericentromeres), crossovers are associated with chromosome**  
32 **missegregation and developmental aneuploidy. In organisms ranging from yeast to**  
33 **humans, crossovers are repressed within (peri)centromeric regions. We previously**  
34 **identified a key role for the multi-subunit, kinetochore-associated Ctf19 complex (Ctf19c;**  
35 **the budding yeast equivalent of the human CCAN) in regulating pericentromeric crossover**  
36 **formation. Here, we develop a dCas9/CRISPR-based system that allows ectopic targeting**  
37 **of Ctf19c-subunits to a non-centromeric locus during meiosis. Using this approach, we**  
38 **query sufficiency in meiotic crossover suppression, and identify Ctf19 (the budding yeast**  
39 **homologue of vertebrate CENP-P) as a central mediator of kinetochore-associated**  
40 **crossover control. We show that the effect of Ctf19 is encoded in its NH<sub>2</sub>-terminal tail, and**  
41 **depends on residues known to be important for the recruitment of the Scc2-Scc4 cohesin**  
42 **regulator to kinetochores. We thus reveal a crucial determinant that links kinetochores to**  
43 **meiotic recombinational control. This work provides insight into localized control of**  
44 **meiotic recombination. Furthermore, our approach establishes a dCas9/CRISPR-based**  
45 **experimental platform that can be utilized to investigate and locally manipulate meiotic**  
46 **crossover control. This platform can easily be adapted in order to investigate other aspects**  
47 **of localized chromosome biology.**

48

49

50

## 51 **Introduction**

52 Faithful chromosome segregation in meiosis requires physical connections between  
53 initially unpaired homologous chromosomes (Petronczki, et al., 2003). Such linkages are  
54 established through homologous recombination (HR) mediated repair of programmed DNA  
55 double strand breaks (DSBs) (Keeney, 2001). Sequences that can act as HR repair templates for  
56 DSB lesions can be found on the sister chromatid and the homologous chromosome, but only  
57 repair that uses the homologous chromosome as a template can result in the reciprocal exchange  
58 of flanking chromosomal arm regions of homologous chromosomes, yielding a crossover. A  
59 crossover, together with cohesin that is laid down distally to the recombination site, establishes  
60 the connection between homologs required for successful chromosome segregation in meiosis.  
61 The placement of crossovers is determined by the location of DSB activity and by repair  
62 decisions after DSB formation. Certain regions in the genome represent a high risk to genome  
63 stability when faced with DSB repair or CO formation, and molecular systems are in place to  
64 spatially control CO placement and thereby guard genomic stability during meiosis.

65 Centromeres are the regions of the chromosomes where kinetochores are nucleated. Kinetochores  
66 are large multi-subunit chromatin-associated assemblies that coordinate microtubule-  
67 chromosome attachments, cell cycle control and local chromosome organization (Musacchio &  
68 Desai, 2017). DSB activity and crossover formation in centromere-proximal regions (*i.e.*  
69 pericentromeres) are suppressed in organisms ranging from yeast to human (Blitzblau et al.,  
70 2007, Borde et al., 1999, Buhler et al., 2007, Centola & Carbon, 1994, Copenhaver et al., 1999,  
71 Ellermeier et al., 2010, Gerton et al., 2000, Gore et al., 2009, Lambie & Roeder, 1988, Mahtani  
72 & Willard, 1998, Nakaseko et al., 1986, Pan et al., 2011, Puechberty et al., 1999, Saintenac et  
73 al., 2009, Westphal & Reuter, 2002). Improper placement of crossovers in pericentromeres is  
74 associated with chromosome missegregation and aneuploidy (Hassold & Hunt, 2001, Koehler et  
75 al., 1996, Lamb et al., 2005, Rockmill et al., 2006). The identity of pericentromeric sequences

76 and chromatin diverges widely among different organisms. In many organisms, pericentromeres  
77 are made up of heterochromatin, and the establishment of this specialized chromatin is important  
78 for the suppression of meiotic DNA break formation and recombination (Ellermeier et al., 2010).  
79 We previously identified a functional contribution of budding yeast kinetochores to local  
80 suppression of crossover formation in nearby pericentromeric sequences (Vincenten, Kuhl et al.,  
81 2015). Within budding yeast kinetochores, the Ctf19c, which is the functional and molecular  
82 equivalent of the human constitutive centromere-associated network (CCAN) (Cheeseman &  
83 Desai, 2008), plays a dual role in minimising CO formation: Ctf19c *i*) suppresses meiotic DSB  
84 formation surrounding kinetochores, and *ii*) channels the repair of remaining DSBs into  
85 intersister-directed repair. Together, these pathways lead to effective suppression of CO  
86 formation within pericentromeres (Kuhl & Vader, 2019, Vincenten et al., 2015). Our experiments  
87 identified a crucial role for pericentromeric cohesin-complexes (containing the meiosis-specific  
88 kleisin Rec8) in promoting intersister-mediated repair without affecting DSB activity (Vincenten  
89 et al., 2015). A recent study in fission yeast also identified a role for pericentromeric cohesin  
90 complexes in suppressing meiotic CO formation, although in this case the effect involved active  
91 suppression of local DSB activity (Nambiar & Smith, 2018).

92 Kinetochores are cooperative assemblies of several protein subcomplexes (Musacchio & Desai,  
93 2017). This biochemical characteristic can lead to pleiotropic loss of several kinetochore subunits  
94 upon experimental interference with single components. For example, many Ctf19c subunits are  
95 co-dependent for their localization to the centromere (Lang et al., 2018, Pekgoz Altunkaya et al.,  
96 2016, Pot et al., 2003). This behaviour has complicated delineating individual contributions of  
97 single kinetochore components to specific functional pathways, including the regulation of local  
98 crossover suppression. In order to dissect individual contributions of kinetochore factors to the  
99 regulation of meiotic recombination, we developed a system that allows investigation of  
100 individual roles of kinetochore subunits in directing meiotic chromosome fragmentation and

101 repair, by employing the dCas9/CRISPR system. Using this approach, we identify the Ctf19  
102 subunit of the Ctf19c as a key mediator of kinetochore-driven CO suppression. Previous work  
103 identified a key role for the unstructured NH<sub>2</sub>-terminal region of Ctf19 in mediating recruitment  
104 of the Scc2-Scc4 cohesin regulator (Hinshaw et al., 2017, Hinshaw et al., 2015). We show that,  
105 remarkably, this 30 amino acid-region of Ctf19 is sufficient to reduce CO formation at an ectopic  
106 site, suggesting a role for local regulation of cohesin function in influencing CO positioning.  
107

## 108 **Materials and Methods**

109

### 110 **Yeast strains and growth**

111 All strains used were of the SK1 background and genotypes are given in Supplementary  
112 Table 1. Yeast cells were grown as described in (Vincenten et al., 2015). Induction of  
113 synchronous meiosis was performed as described in (Vader et al., 2011). Synchronous entry of  
114 cultures into the meiotic program was confirmed by flow cytometry-based DNA content analysis  
115 (see below). For expression of 3xFlag-dCas9 in meiosis, Gibson assembly was used to clone  
116 *3XFLAG-dCas9-tCYC1* in a *TRP1* integrative plasmid containing the promoter of the meiosis-  
117 specific gene *HOP1* (*pHOP1*; SGD coordinates 226,101-226,601; Chr. IX) to create *pHOP1-*  
118 *3XFLAG-dCas9-tCYC1*. The plasmid containing *3XFLAG-dCas9/pTEF1p-tCYC1* was a gift  
119 from Hodaka Fujii and obtained via Addgene.org (Addgene plasmid #62190) (Fujita et al., 2018).  
120 Constructs that express different kinetochore subunits (*i.e.* *CTF19*, *IML3*, *WIP1*, *CTF3*, and  
121 *NDC10*) were constructed by Gibson assembly. Yeast ORFs were PCR amplified from genomic  
122 (SK1) yeast DNA. All fusion constructs were cloned in the same order: *pHOP1-ORF-3xFLAG-*  
123 *dCAS9-tCYC1*. *DBF4* (PCR amplified from SK1 genomic DNA) was cloned COOH-terminally  
124 of *dCAS9*, and the two ORFs were separated by a 6xGlycine linker peptide. Constructs containing  
125 *ctf19<sub>1-30</sub>*, *ctf19<sub>1-30(2x)</sub>*, *ctf19-9a* and *ctf19<sub>1-30 9A</sub>* were generated by Gibson assembly based on gene  
126 fragments synthesized by Genewiz. The two *ctf19<sub>1-30</sub>* fragments in *ctf19<sub>1-30(2x)</sub>* are separated by a  
127 6xGlycine linker peptide. The *ctf19-9A* is based on (Hinshaw et al., 2017), and carry the  
128 following mutations in *CTF19*: T4A, S5A, T7A, T8A, S10A, T13A, S14A, S16A and S19A).  
129 SgRNA molecules were expressed from an URA3-integrated plasmid (pT040), which was a gift  
130 from John Wyrick and obtained via Addgene.org (Addgene plasmid #67640) (Laughery et al.,  
131 2015). For cloning of the three different sgRNA vectors used here, custom synthesized sgRNA  
132 cassettes for ‘mock’, ‘III’ and ‘VIII’ (Genewiz) were restriction cloned into pT040, to create the

133 used *URA3* integrative plasmids. The used 20-mer target-specific complementary sequences  
134 (which are located directly upstream of PAM sequence) were: ‘*III*’: 5’ TCT TAT ATA CAG  
135 GAG ATG GG 3’(SGD coordinates: 209,871-209,890; Chr. *III*). ‘*VIII*’: 5’ AGA CCT TTA TAG  
136 TAC TGT TA 3’(SGD coordinates: 146,203-146,222; Chr. *VIII*). All constructs were sequence  
137 verified.

138 For live cell reporter assays, we used two recombination reporter loci, as described in (Vincenten  
139 et al., 2015). For the chromosome arm reporter, *pYKL050c-CFP* was integrated at the *THR1*  
140 locus; *pYKL050c-RFP* was integrated at SGD coordinates 150,521-151,070; Chr. *VIII*;  
141 *pYKL050c-GFP\** was introduced at the *ARG4* locus. For the centromeric reporter locus,  
142 *pYKL050c-CFP* was integrated at the *THR1* locus; *pYKL050c-RFP* was integrated at *CEN8* (Chr.  
143 *VIII*); and *pYKL050c-GFP\** was introduced at SGD coordinates 115,024-115,582 (Chr. *VIII*).  
144 Plasmids containing *pYKL050c-CFP/RFP/GFP\** were described in (Thacker et al., 2011).

145 To generate SK1 strains carrying *ctf19-9A* alleles, haploid strain yAM3563  
146 (carrying *ctf19Δ::KanMX6*) was transformed with PCR product amplified from plasmid  
147 AMp1619 and corresponding to full-length *ctf19-9A* (carrying mutations: T4A, S5A, T7A,  
148 T8A, S10A, T13A, S14A, S16A and S19A as previously described (Hinshaw et al., 2017) and  
149 a downstream marker (*LEU2*). G418-sensitive, leucine prototrophs carrying all mutations were  
150 confirmed by sequencing.

151

## 152 **Growth conditions**

153 Solid and liquid yeast cultures were grown as described in (Vincenten et al., 2015).

154

## 155 **SDS-Page and western blotting**

156 Samples taken from synchronous meiotic cultures (5 mL; time points are indicted per  
157 experiments) were centrifuged at 2,700 rpm for 3 minutes. Cell pellets were precipitated in 5 mL

158 5 % TCA and washed with 800  $\mu$ L acetone. Precipitates were dried overnight and resuspended  
159 in 200  $\mu$ L protein breakage buffer (4 mL TE buffer, 20  $\mu$ L 1M DTT). 0.3 g glass beads were  
160 added and the cells in the samples were lysed using a FastPrep-24 (MP Biomedicals). 100  $\mu$ L of  
161 3x SDS loading buffer was added, and processed using standard SDS-Page western blotting  
162 methodology. The following primary antibodies were used:  $\alpha$ -Flag M2 (Sigma-Aldrich; 1:1000),  
163  $\alpha$ -Flag (Abcam, 1:1000)  $\alpha$ -HA (Biolegend; 1:500, or Sigma-Aldrich; 1:1000),  $\alpha$ -Pgk1 (Thermo  
164 Fischer; 1:1000),  $\alpha$ -GFP (Roche; 1:1000).

165

### 166 **Co-Immunoprecipitation**

167 Samples taken from synchronous meiotic cultures (200 mL; samples were taken 5 hours  
168 post inoculation) were centrifuged at 2,700 rpm for 3 minutes. Samples were resuspended in  
169 500  $\mu$ L M2 buffer (0.05 M Tris (pH 7.4), 0.15 M NaCl, 1% (v/v) Triton X-100, 1 mM EDTA)  
170 containing Phenylmethylsulphonylfluoride, Sodium Orthovanadate, cOmplete Mini, EDTA free  
171 Protease Inhibitor Cocktail (Roche) and a protease inhibitor mix in DMSO (SERVA). 0.6 g of  
172 glass beads were added and the cells were lysed in a FastPrep-24 (MP Biomedicals). Lysates  
173 were sonicated using a BioruptorPlus (Diagenode) at 4 °C (set at 25 cycles of 25 seconds). Lysates  
174 were centrifuged at 15,000 rpm (at 4 °C for 15 minutes). 450  $\mu$ L of the cleared lysates were  
175 incubated with 1  $\mu$ L of primary antibody ( $\alpha$ -Flag M2 (Sigma-Aldrich; 1:400)) at 4 °C for 3  
176 hours. 25  $\mu$ L of Protein G Dynabeads (Invitrogen-Thermo Fischer) was added and the samples  
177 were incubated at 4 °C overnight. Resin was washed five times with 500  $\mu$ L cold M2 buffer  
178 and once with 500  $\mu$ L cold M2 buffer without detergent. 50  $\mu$ L of 2x SDS buffer was added  
179 and samples were heated at 65 °C for 30 minutes. For input, 50  $\mu$ L of the clear supernatant was  
180 precipitated with 5  $\mu$ L 100% TCA and washed with acetone. Precipitates were resuspended in  
181 50  $\mu$ L TCA resuspension buffer (7 M Urea, 2% SDS, 50 mM Tris (pH 7.5)), and 25  $\mu$ L of 3x



182 SDS loading buffer were added. Samples were processed using standard SDS-Page western  
183 blotting methodology.

184

### 185 **Flow cytometry**

186 Synchronous progression of meiotic cultures was assessed by flow cytometry as  
187 described in (Vader et al., 2011), using an Accuri™ C6 Flow Cytometer (BD Biosciences).

188

### 189 **Fluorescent Crossover Reporter Assay**

190 Diploid yeast strains carrying the fluorescent reporter construct were induced into  
191 synchronous meiotic liquid cultures. After 24 hours of incubation, 2 mL aliquots of those  
192 samples were lightly sonicated with a Sonifier 450 (Branson Ultrasonics Corporation) (tetrad  
193 integrity was not disrupted by sonication), spun down for 5 minutes at 4000 rpm in and  
194 resuspended in 200  $\mu$ L H<sub>2</sub>O, and mounted onto coverslides. Imaging was done using a Delta  
195 Vision Ultra High Resolution Microscope (GE Healthcare), whereby each chosen coordinates of  
196 the sample were imaged in the CFP, mCherry and Green channel. The pictures were processed  
197 with ImageJ. Only tetrads comprising four visible spores in the CFP channel were counted, in  
198 order to prevent confounding effects due to meiotic chromosome missegregation. Map distance  
199 (cM) and standard errors were calculated using online tools  
200 (<http://elizabethhousworth.com/StahlLabOnlineTools/EquationsMapDistance.html>). Statistical  
201 significance was calculated using Fisher's exact test  
202 (<https://www.socscistatistics.com/tests/fisher/default2.aspx>).

203

### 204 **Chromatin immunoprecipitation**

205 Cells of 100 ml sporulation culture (harvested 4.5 hours post inoculation) were  
206 crosslinked with 1% formaldehyde for 15 min at room temperature. Crosslinking was quenched

207 for 5 min at room temperature by adding 2.5 M Glycine to a final concentration of 125 mM.  
208 Quenched cells were pelleted for 3 min at 4 °C, at 3,000 rpm and washed once with 20 mL ice-  
209 cold 1x TBS buffer. Pre-chilled M2 lysis buffer and an equal volume of glass beads (Carl Roth)  
210 was added. Cells were lysed using a FastPrep-24 (MP Biomedicals). Cell lysates were mixed  
211 on a VXR basic Vibrax (IKA) for 2 min at 1500 rpm. Chromatin was fragmented by sonication  
212 using Branson Sonifier 450 at output control 2, constant cycle three times for 15 sec. In between  
213 runs, samples were kept on ice for 2 min. Cellular debris was pelleted for 10 min at 4 °C, 15,000  
214 rpm and crude lysate was collected. As input sample, 50 µL of the crude lysate was added to  
215 200 µL of 1x TE/ 1% SDS buffer and stored at 4 °C until reversal of crosslinking. For α-Flag  
216 ChIPs, 500 µL of the crude lysate was incubated with 40 µL of 50 % slurry of α-Flag M2 beads  
217 (Sigma-Aldrich) for 2 hours, after which resin was washed four times with 500 µL of ice-cold  
218 M2 buffer and once with 500 µL of M2 buffer without detergent. Protein-DNA complexes were  
219 eluted from the beads by adding 200 µL of ice-cold M2 buffer without detergent containing  
220 3xFLAG peptides (Sigma-Aldrich) (final concentration of 150 ng/µL) and rotated at 4 °C for  
221 30 min. Resin was pelleted in a refrigerated centrifuge for 30 sec at 9,000 rpm and the  
222 supernatant containing the protein-DNA complexes was transferred to a new tube. This step  
223 was repeated and 800 µL of 1x TE/ 1% SDS buffer was added to the total eluate. For α-HA  
224 ChIPs, 500 µL of the crude lysate was incubated with 1µL of α-HA antibody (BioLegend) for  
225 3 hours at 4 °C. 35 µL of a 50% slurry of protein G Dynabeads (Invitrogen) was added, and  
226 lysate was incubated overnight at 4 °C. Resin was washed four times with ice-cold M2 buffer  
227 without inhibitor, and once with ice-cold M2 buffer without detergent. Supernatant was  
228 removed, and resin was resuspended in 200 µL of 1x TE/ 1% SDS buffer and incubated at 65  
229 °C for 18 hours to reverse crosslinking. 5 µL of glycogen (20 mg/ ml) and 5 µL of proteinase K  
230 (20 mg/ ml; Roche) were added to the samples and incubated at 37 °C for 2 hours. ChIP samples

231 were split and 68.7  $\mu$ L of 3 M LiCl and 1 mL of 100% ethanol was added to the input and ChIP  
232 samples and precipitated at  $-20^{\circ}\text{C}$  overnight. DNA was pelleted at 15,000 rpm for 10 min and  
233 washed once with 75% ethanol. DNA pellets were resuspended in 50  $\mu$ L of TE containing  
234 RNase A (1  $\mu$ L / 100  $\mu$ L) and incubated at  $37^{\circ}\text{C}$  for 30 min. Real time quantitative PCR  
235 (qPCR) was performed using a 7500 Fast Real-Time PCR System (Applied Biosystems).  
236 PerfeCTa® SYBR® Green FastMix was used. The threshold cycle number ( $C_t$  value) of a fast  
237 2-Step cycling program for product detection was used to normalize the ChIP-qPCR data  
238 according to the Percent Input method.

239 Primers used:

240 GV2464: 5' CGT AGA TTT TAT ACA CGC AC 3'

241 GV2465: 5' GAG GCA GGT CTA AGA AGA AA 3'; primer pair amplifies SGD coordinates  
242 209,845-209,921; Chr. *III*.

243 GV2472: 5' TAAATGTACCTTACCATGTTG 3'

244 GV2473: 5' TCCGGACTCGTCCAATCTTT 3'; primer pair amplifies SGD coordinates  
245 146,165-146,236; Chr. *VIII*.

246 GV2569: 5' GATCAGCGCCAAACAATATGGAAAATCC 3'

247 GV2570: 5' AACTTCCACCAGTAAACGTTTCATATATCC 3'; primer pair amplifies SGD  
248 coordinates 114,321-114,535; Chr. *III*.

249

## 250 **Southern blot analysis of DSB formation.**

251 Southern blotting was performed as previously described (Vader et al., 2011), using the  
252 following probe (SGD coordinates): *YCR047C*; *III*, 209,361-201,030; Chr. *III*. DSB intensities  
253 were calculated from three independent experiments using ImageJ. Error bars indicate standard  
254 error of the mean.

255

256 **Spo11-oligo mapping**

257 Spo11 oligo mapping data from wild type strains mapped to the S288c genome  
258 assembly R64 (sacCer3) and normalized to the total number of uniquely mapped reads (reads  
259 per million) was retrieved from the Gene Expression Omnibus (GEO), access number:  
260 GSE67910 (GSM1657849 and GSM1657850) (Zhu & Keeney, 2015). Peaks were visualized  
261 on Integrative Genome Browser.

262

263

## 264 **Results**

265 To dissect individual contributions of kinetochore factors to regulation of meiotic  
266 recombination, we developed a system to query the individual roles of kinetochore (and  
267 specifically, Ctf19c) subunits in directing meiotic chromosome fragmentation and repair. We  
268 were inspired by earlier approaches, that relied on integration of ectopic DNA arrays coupled to  
269 the expression of cognate targeting units fused to genes of interest, to successfully isolate aspects  
270 of kinetochore function (Gascoigne et al., 2011, Ho et al., 2014, Kiermaier et al., 2009, Lacefield  
271 et al., 2009). However, since DNA integration can cause unwanted effects on meiotic  
272 DSB/recombination patterns, we opted for an approach not requiring integration of foreign DNA  
273 at a locus of interest. The CRISPR-dCas9 system (Wang et al., 2016) employs a mutated,  
274 catalytically-dead version of Cas9 nuclease (Gilbert et al., 2013) (dCas9) that can be recruited to  
275 genomic loci when paired with specific single guide RNAs (sgRNAs) (**Figure 1A**). sgRNA-  
276 driven recruitment of dCas9 occurs without cleavage of the targeted DNA sequence, and can  
277 direct fused proteins of interest to defined loci. This approach has successfully been used for a  
278 myriad of applications (*e.g.* (Liu et al., 2017, Xu et al., 2016)). We used a dCas9 that was tagged  
279 at its NH<sub>2</sub>-terminus with a 3xFlag tag (3xFlag-dCas9) and placed under the control of the  
280 promoter of the meiosis-specific *HOP1* gene (*pHOP1*, creating *pHOP1-3XFLAG-dCas9*),  
281 ensuring meiosis-specific expression to avoid potential interference with chromosome  
282 segregation during vegetative growth (Vershon et al., 1992) (**Figure 1A and B**). Western blot  
283 analysis using  $\alpha$ -Cas9 or  $\alpha$ -Flag confirmed the meiosis-specific induction of 3xFlag-dCas9  
284 (**Figure 1C**). We combined this system with a fluorescence-based assay to measure local CO  
285 recombination frequencies within a defined region on the (non-pericentromeric) arm of  
286 chromosome *VIII* (Thacker et al., 2011, Vincenten et al., 2015) (**Figure 1D-F**). Throughout this  
287 study we used three sgRNA expression cassettes (Laughery et al., 2015) in combination with  
288 dCas9-fusion constructs: one sgRNA targets an intergenic chromosomal position between the

289 genes *YHR020W* and *YHR021C* located within the 10 kilobase interval flanked by the GFP and  
290 RFP markers of the recombination reporter on chromosome *VIII* (Thacker et al., 2011) (**Figure**  
291 **1D** and **Supplementary Figure 1A**). We previously observed a ~6 kb sized DSB effect  
292 surrounding centromeres (Vincenten et al., 2015), and thus chose a target position within a  
293 distance of ~2.5 kilobases from the major DNA break hotspot in the divergent promoters of the  
294 genes *YHR019C* and *YHR020W* (Pan et al., 2011). This sgRNA molecule is referred to as ‘*VIII*’.  
295 We also used a sgRNA (‘*III*’), which directs the dCas9 to the intergenic region in between  
296 *YCR045C* and *YCR046C* on chromosome *III*, in the vicinity (~1,8 kilobases away) of a strong  
297 natural DSB hotspot (‘*YCR047C*’; **Figure 6A** and see below). We further used a sgRNA  
298 molecule that lacks the 20-nt target sequence, referred to as ‘mock’, as a control. sgRNA *VIII*  
299 and *III* are located in intergenic regions to minimize interference with the gene expression in  
300 order to prevent potential indirect effects on DSB activity (**Figure 6** and **Supplementary Figure**  
301 **1**). We performed  $\alpha$ -Flag ChIP-qPCR to confirm specific enrichment of 3xFlag-dCas9 to desired  
302 regions when combined with the corresponding sgRNAs (**Figure 1G**). We next ascertained that  
303 targeting of 3xFlag-dCas9 within the reporter locus on chromosome *VIII* or when combined with  
304 *III* or mock sgRNAs did not interfere with wild type recombination frequencies in this interval  
305 (**Figure 1H**). Indeed, upon 3xFlag-dCas9 targeting, observed crossover frequencies were  
306 indistinguishable from reporter frequencies within this interval (*i.e.* without any dCas9  
307 expression or targeting) (Vincenten et al., 2015). These results verify the development of our  
308 ectopic targeting system to investigate meiotic recombination, and show that dCas9 can be  
309 targeted to defined regions within the genome without causing unwanted effects on meiotic  
310 recombination frequencies.

311 Fusions of dCas9 with selected kinetochore components were generated, in order to  
312 interrogate contributions of these factors (and directly associated and co-targeted factors) to local  
313 suppression of meiotic recombination. We fused factors of the budding yeast kinetochore at their

314 COOH-termini with the 3xFlag-dCas9 moiety (*i.e.* the organization of these polypeptides is:  
315 protein of interest-3xFlag-dCas9, where the 3xFlag moiety also functions as an unstructured  
316 linker peptide). Functional COOH-terminal GFP fusions of the factors that we investigated here  
317 (see below) have been described (*e.g.* (Ho et al., 2014) (Schmitzberger et al., 2017) (Schleiffer,  
318 Maier et al., 2012), which we reasoned increased the chances that similarly organized dCas9  
319 fusions would be functional. Five factors that represent kinetochore/Ctf19C sub-complexes  
320 within the Ctf19C were investigated: Ctf19, Iml3, Wip1, Ctf3 and Ndc10 (**Figure 2A**). All  
321 factors were efficiently expressed during meiosis when fused to 3xFlag-dCas9 (like 3xFlag-  
322 dCas9, expression of these constructs was driven by *pHOP1*) (**Figure 2B**). Importantly, Ctf19-,  
323 Iml3-, Wip1-, and Ctf3-3xFlag-dCas9 fusions were able to rescue spore viability defects  
324 normally observed in their respective gene deletions (**Supplementary Figure 2A-C**), confirming  
325 functionality of these fusion proteins. In addition, ectopic expression in an otherwise wild type  
326 background did not interfere with endogenous kinetochore function and meiotic chromosome  
327 segregation (**Supplementary Figure 2A-C**). Due to the essential nature of *NDC10*, we did not  
328 test functionality of Ndc10-3xFlag-dCas9.

329 We investigated whether ectopic recruitment of these factors resulted in effects on recombination  
330 frequencies on chromosome *VIII*. Interestingly, we observed a moderate, but significant  
331 reduction in recombination frequency in cells expressing Ctf19-3xFlag-dCas9 in combination  
332 with sgRNA *VIII* (**Figure 2C**). This effect appeared specific for Ctf19: targeting Iml3, Wip1,  
333 Ctf3 or Ndc10 did not significantly change frequencies. In addition, the Ctf19-driven effect  
334 depended on its local recruitment: when *pHOP1-CTF19-3XFLAG-dCAS9* was combined with  
335 mock or *III* sgRNAs, no effects on recombination frequencies on the interval on chromosome  
336 *VIII* were observed (**Figure 2D**). These data demonstrate the feasibility of our dCas9-targeting  
337 system and isolate the Ctf19 subunit of the kinetochore as a factor whose local targeting at a non-  
338 centromeric locus is able to influence meiotic recombination.

339 We aimed to further investigate the contribution of Ctf19 to ectopically-induced  
340 crossover regulation. Ctf19 is an RWD domain-containing protein that forms a stable  
341 heterodimer with Mcm21, also an RWD domain protein (Schmitzberger & Harrison, 2012)).  
342 Together with Ame1 and Okp1, the Ctf19-Mcm21 dimer forms the COMA Ctf19c-subcomplex  
343 (De Wulf et al., 2003) (**Figure 3A**). We found that the fusion protein Ctf19-3xFlag-dCas9  
344 co-immunoprecipitates with Mcm21-3HA (**Figure 3B**), and, as judged by ChIP-qPCR, was able  
345 to co-recruit Mcm21-3HA to the target locus on chromosome *VIII* (**Figure 3C**). This indicates  
346 that Ctf19-Mcm21 (and possibly the entire COMA complex) is co-recruited upon targeting of  
347 Ctf19 to an ectopic location. The assembly of additional Ctf19-C proteins, such as the Chl4-Iml3  
348 subcomplex, at kinetochores depends on COMA (Schmitzberger et al., 2017) (Pot et al., 2003).  
349 Despite an efficient interaction between Ctf19-3xFlag-dCas9 and Chl4-3HA (as judged by Co-  
350 IP; **Figure 3D**), we did not observe Chl4-3HA accumulation at the target locus on arm *VIII* in  
351 *pHOP1-CTF19-3XFLAG-DCAS9, sgRNA-VIII* expressing cells. This observation reveals that  
352 ectopic targeting of Ctf19 is not sufficient to co-recruit the Chl4-Iml3 complex (**Figure 3E and**  
353 **Supplementary Figure 3A**). The discrepancy between the interaction and recruitment could be  
354 explained by the observed interaction taking place at native kinetochores, where Ctf19-3xFlag-  
355 dCas9 is present, in addition to the ectopic targeting site (note that Ctf19-dCas9 rescued *ctf19Δ*,  
356 indicating that this fusion is incorporated into native kinetochores, **Supplementary Figure 2A**).  
357 We did not detect an interaction between Mtw1-GFP (a non-Ctf19C kinetochore factor) and  
358 Ctf19-3xFlag-dCas9 (**Supplementary Figure 3B**). These data demonstrate that ectopic targeting  
359 of Ctf19 leads to co-recruitment of its direct binding partner Mcm21 (and thus potentially of the  
360 entire COMA complex), but is insufficient to lead to co-recruitment of other Ctf19C/kinetochore  
361 factors, such as Iml3-Chl4 and Mtw1.

362 Our results suggest that the effect of Ctf19-3xFlag-dCas9 on crossover suppression is  
363 encoded within the factors that are recruited to the ectopic site. From this it follows that the Ctf19-



364 driven effect should occur independently of non-recruited kinetochore factors, such as the Chl4-  
365 Iml3 complex. Indeed, targeting of Ctf19-3xFlag-dCas9 in *iml3Δ* cells to the target locus on arm  
366 *VIII* led to an equal reduction in recombination rates, as in a wild type background (**Figure 3F**  
367 **and G**). This points to a central role for Ctf19 (and potentially its associated COMA complex  
368 binding partners, such as Mcm21) in regulating crossover suppression.

369 To dissect how Ctf19 influences meiotic recombination, we focussed on the role of Ctf19  
370 in regulating cohesin (Fernius & Marston, 2009) (Hinshaw et al., 2017, Hinshaw et al.,  
371 2015)(**Figure 4A**). Ctf19 recruits Scc2-Scc4, a key regulator of chromosomal loading and  
372 stimulator of cohesin ATPase activity, to kinetochores and influences cohesin throughout  
373 surrounding pericentromeres (Davidson et al., 2019, Fernius & Marston, 2009, Gutierrez-  
374 Escribano et al., 2019, Hinshaw et al., 2017, Hinshaw et al., 2015, Petela et al., 2018). Scc2-Scc4  
375 associates with the first 30 NH<sub>2</sub>-terminal amino acids of Ctf19, and this interaction is dependent  
376 on phosphorylation of 9 serine/threonine residues within this region by the Cdc7/Dbf4 kinase  
377 (also known as DDK) (Hinshaw et al., 2017). Mutating these residues to non-phosphorylatable  
378 residues (in the *ctf19-9A* allele) impairs efficient recruitment of Scc2-Scc4 and has downstream  
379 effects on cohesin function (Hinshaw et al., 2017). We found that when targeted to the target  
380 locus on arm *VIII*, Ctf19-9A was unable to suppress recombination frequencies (in fact, crossover  
381 frequency was slightly increase under this condition), in contrast to what was observed for wild  
382 type Ctf19 (**Figure 4B and C**). Ctf19-9A was, as expected, still able to associate with Mcm21  
383 and Chl4 (**Figure 4D and Supplementary Figure 4A**). These results suggest that the effect of  
384 Ctf19 on local crossover suppression was likely connected to its described role in kinetochore-  
385 recruitment of Scc2-Scc4, and downstream effects on cohesin function.

386 We aimed to further explore this idea. First, we tested the ability of a construct containing the  
387 first 30 NH<sub>2</sub>-terminal amino acids of Ctf19 (which fall outside of the structured RWD) in  
388 mediating crossover reduction. Strikingly, we found that the first 30 NH<sub>2</sub>-terminal amino acids

389 of Ctf19 (when fused to dCas9) were sufficient to instigate crossover suppression to the same  
390 level as full length Ctf19 (**Figure 4E-G**). Importantly, as in the full-length case, this suppression  
391 was abolished upon mutation of the 9 DDK-targeted residues in this NH<sub>2</sub>-terminal fragment.  
392 Ctf19<sub>1-30</sub> was unable to associate with Mcm21 or Chl4, as expected from the described  
393 requirement for the RWD domain of Ctf19 in mediating interactions with the COMA and Ctf19c  
394 components (**Figure 4H** and **Supplementary Figure 4B**). These findings show that the  
395 suppression of meiotic recombination instated by Ctf19 is encoded in its NH<sub>2</sub>-terminal tail, and  
396 depends on residues that are important for the recruitment of the Scc2-Scc4 cohesin regulator.

397         Although our recombination analysis established that ectopic targeting of Ctf19 causes  
398 crossover suppression, the effect that we observed at an ectopic locus was not as penetrant as  
399 (Ctf19-dependent) suppression of recombination observed at native pericentromeres (Vincenten  
400 et al., 2015). This can ostensibly be because certain aspects/factors of native kinetochores that  
401 contribute to efficient recombinational suppression might not be efficiently recapitulated in our  
402 ectopic targeting system. We aimed to address this possibility. First, we considered the  
403 stoichiometry of the native kinetochore. Based on biochemical and structural analyses, it is  
404 assumed that the kinetochore contains two Ctf19c assemblies (Hinshaw & Harrison, 2019, Yan  
405 et al., 2019)(**Figure 5A**). In our dCas9-targeting system, we only target a single Ctf19-molecule;  
406 we thus aimed to engineer a fusion construct that allowed ‘dimeric’ targeting of Ctf19. To do so,  
407 we made use of the fact that Ctf19<sub>1-30</sub> was sufficient to trigger crossover suppression. We  
408 constructed a dimeric Ctf19<sub>1-30</sub> (Ctf19<sub>1-30(2X)</sub>)-dCas9 fusion (**Figure 5B**), and expression of this  
409 construct led to a stronger reduction on recombination frequency as compared to the ‘monomeric’  
410 Ctf19<sub>1-30</sub>(**Figure 5C and D**). Importantly, the suppression of crossover activity in this ‘dimeric’  
411 construct was present even in *mcm21Δ* cells (**Figure 5E and F**), again strengthening the  
412 conclusion that observed crossover suppression is driven by the NH<sub>2</sub> terminus of Ctf19, and  
413 occurs independently of the direct binding partner of Ctf19, Mcm21.

414           Next, we focused on Cdc7/DDK, which is recruited to kinetochores in a Ctf3-dependent  
415 manner (Hinshaw et al., 2017). DDK is responsible for the phosphorylation-dependent binding  
416 of Scc2-Scc4 to the NH<sub>2</sub>-terminus of Ctf19 (Hinshaw et al., 2017). We surmised that Ctf3 (and  
417 thus DDK) would not be effectively co-recruited by Ctf19-dependent targeting. Under such an  
418 assumption, non-kinetochore, chromatin-associated DDK would be responsible for (potentially  
419 inefficient) phosphorylation of Ctf19. Cdc7/DDK is associated with traveling replisomes  
420 (Murakami & Keeney, 2014, Takahashi et al., 2008), and this pool of DDK could be responsible  
421 for phosphorylation of ectopically targeted Ctf19. We thus aimed to co-recruit Dbf4 (and with it  
422 Cdc7) to Ctf19. To do so, we generated a *CTF19-dCAS9-DBF4* construct, wherein Dbf4 is fused  
423 to the COOH-terminus of dCas9 (note that in this construct, dCas9 and Dbf4 are separated by an  
424 unstructured linker peptide) (**Figure 5G**). Interestingly, we observed that expressing this  
425 chimeric fusion construct led to stronger suppression of crossover frequency as compared to  
426 Ctf19-dCas9 alone (**Figure 5H and I**). Importantly, mutation of the nine NH<sub>2</sub> phosphoacceptor  
427 sites of Ctf19 in a chimeric fusion between Ctf19, dCas9 and Dbf4 (*i.e.* *ctf19-9A-dCAS9-DBF4*)  
428 largely eliminated crossover suppression (**Figure 5H**). These data together suggest that efficient  
429 phosphorylation of (the NH<sub>2</sub> terminus of) Ctf19, driven by DDK, is crucial for crossover  
430 suppression.

431           We aimed to investigate how ectopic targeting led to local crossover suppressive function.  
432 In our earlier work (Vincenten et al., 2015), we proposed that crossover suppression at  
433 pericentromeres is achieved by *i*) a suppression of DSBs and *ii*) a preferential channelling of  
434 remaining DSBs into the repair pathway that yields intersister CO repair over interhomolog CO  
435 repair. Ctf19 likely plays a role in both pathways (Vincenten et al., 2015), and we investigated  
436 whether ectopic targeting of Ctf19 led to local decreases in DSB activity. To test this, we used  
437 our system to recruit several Ctf19-fusion constructs to the vicinity of the *YCR047C* DSB hotspot  
438 on chromosome *III*, using sgRNA *III*. As shown in **Figure 6A-C**, the targeting of either Ctf19,

439 Ctf19<sub>1-30(2X)</sub>, or Ctf19 together with Dbf4, did not significantly alter DSB levels, as judged by  
440 Southern blot analysis of DNA breakage at *YCR047C*. This suggests that the crossover-  
441 suppressive functionality that was seen in the Ctf19-based targeting modules occurs  
442 independently of a DSB-reducing effect. We suggest that the DSB-protective role of  
443 Ctf19/Ctf19c is related to its structural role in establishing kinetochore integrity (Pot et al., 2003)  
444 (Lang et al., 2018, Pekgoz Altunkaya et al., 2016).

445         Finally, we aimed to address whether the observations made using our ectopic targeting  
446 system also held true at native pericentromeres. We thus analyzed crossover frequency using a  
447 live cell reporter assay to measure recombination frequency in the vicinity of *CEN8*, as described  
448 earlier (Vincenten et al., 2015) in a *ctf19-9A* mutant background. Indeed, as expected from our  
449 dCas9-based analysis, we found that *ctf19-9A* triggered a specific increase in crossover frequency  
450 at *CEN8* (**Figure 7A**). Together, these experiments, together with earlier work that linked  
451 Scc2/Scc4 function to local crossover control (Vincenten et al., 2015), demonstrate that, also at  
452 native kinetochores, the NH<sub>2</sub> terminus of Ctf19 is central to regulation of local crossover repair  
453 of meiotic DSBs.

454

## 455 Discussion

456 Control of DSB formation and meiotic crossover repair is crucial for faithful execution  
457 of the meiotic program. Too few or too many crossovers, crossovers placed at the wrong location,  
458 or DSB formation within at-risk regions endanger fidelity of meiosis and jeopardize genome  
459 stability (Sasaki et al., 2010). Many factors influence crossover formation, either by influencing  
460 DSB activity or post-DSB repair decisions (Hunter, 2015, Keeney, 2001), and manipulating these  
461 factors leads to global DSB and/or recombination effects. In addition, localized systems that  
462 control recombination within specific genomic regions exist (*e.g.* (Ellermeier et al., 2010,  
463 Nambiar & Smith, 2018, Vader et al., 2011, Vincenten et al., 2015)). One such localized  
464 mechanism is kinetochore-derived and minimizes DSB activity and crossover formation within  
465 surrounding pericentromeres (Vincenten et al., 2015). Here, we shed light on this mechanism.  
466 We developed a dCas9-based system that allowed us to target individual kinetochore/Ctf19c  
467 subunits, and to precisely dissect the mechanism of kinetochore-driven crossover regulation.  
468 Using this system, we identified the Ctf19 protein as a nexus in mediating kinetochore-derived  
469 crossover suppression.

470 Ctf19 is an RWD-domain containing protein, whose structural role within the kinetochore  
471 is linked to its assembly into the COMA complex (together with Okp1-Mcm21-Ame1)  
472 (Schmitzberger & Harrison, 2012, Schmitzberger et al., 2017). In addition, the unstructured NH<sub>2</sub>-  
473 terminal extension (amino acids 1-30) of Ctf19 functions as a phospho-dependent binding site  
474 for the Scc2/Scc4 cohesin loader and activator complex (Fernius & Marston, 2009, Hinshaw et  
475 al., 2017, Hinshaw et al., 2015). We provide evidence that the contribution of Ctf19 to local  
476 crossover regulation is mediated by this pathway: *i*) abolishing the DDK-driven phosphorylation  
477 (by mutating 9 phosphoacceptor sites (*ctf19-9A*)) prevents crossover suppression in a dCas9-  
478 targeted Ctf19 fusion, *ii*) the NH<sub>2</sub>-terminal 30 amino acids (*ctf19<sub>1-30</sub>*) are sufficient to mediate  
479 ectopic suppression when targeted, and suppression depends on the same phosphoacceptor sites,

480 *iii*) co-targeting Dbf4 (*i.e.* DDK) with this NH<sub>2</sub>-terminal fragment strengthens crossover  
481 suppression, in a manner that again depends on the presence of phosphorylatable residues within  
482 Ctf19<sub>1-30</sub>, and *iv*) mutating the 9 DDK phospho-sites in Ctf19 (*i.e.* *ctf19-9a*) leads to increased  
483 crossover recombination at a native pericentromere. Taken together, our findings suggest that the  
484 NH<sub>2</sub> region of Ctf19, through the recruitment of DDK-driven Scc2/4, impacts local crossover  
485 regulation. How does this pathway eventually suppress crossover formation? Local Scc2/4  
486 function can alter cohesin function, by enhancement of chromosomal loading and via stimulation  
487 of cohesin's ATPase activity (and likely also cohesin-dependent loop extrusion activity) (Petela  
488 et al., 2018) (Davidson et al., 2019, Fernius & Marston, 2009, Gutierrez-Escribano et al., 2019,  
489 Hinshaw et al., 2017, Hinshaw et al., 2015, Paldi et al., 2019). We proposed earlier that this  
490 alteration in cohesin function leads to a local shift in repair choice from interhomolog- into  
491 intersister-based repair (Kim et al., 2010) (Vincenten et al., 2015). As such, local DSB repair will  
492 favor the eventual repair by using sequences present on sister chromatids. Intersister-based repair  
493 does not lead to crossover formation (and interhomolog connections) and has been proposed to  
494 preferentially occur within pericentromeric regions (Vincenten et al., 2015). Our data thus  
495 strengthen the idea that a central role of the kinetochore (and Ctf19) in minimizing meiotic  
496 crossovers revolves around its influence on local cohesin function (Kuhl & Vader, 2019).

497         The level of crossover suppression that we observed upon targeting of Ctf19 was modest  
498 in comparison to the crossover suppression normally seen around native kinetochores; for  
499 example, compare the data in **Figures 2-5** to those in **Figure 7**; also see (Vincenten et al., 2015).  
500 We envision several possible (technical and biological) explanations for this discrepancy, and  
501 we addressed some of these in this study.  
502 First, as we show in **Figure 6**, ectopic targeting of Ctf19 does not appear associated with local  
503 DSB suppression. At native kinetochores the Ctf19c suppresses DSB activity ~5-fold within the  
504 6 kb genomic regions that surround centromeres. A lack of DSB suppression in the case of

505 ectopic Ctf19-targeting (as observed here) can explain (in part) why total crossover repression is  
506 not as penetrant as normally seen around native kinetochores. In agreement with this  
507 interpretation (and with our results upon targeting Ctf19 and its NH<sub>2</sub>-terminal fragments),  
508 interfering with cohesin function (via the *scc4-m35* allele) (Hinshaw et al., 2015) did not impair  
509 kinetochore-driven DSB suppression (Vincenten et al., 2015). These findings hint that DSB  
510 suppression at native kinetochores is related the structural assembly of the Ctf19c/kinetochore.  
511 Second, it is likely that the targeting of Ctf19 using our dCas9-system fails to completely  
512 reconstitute particular aspects of kinetochore organization that influence crossover regulation. In  
513 fact, we initially set out to achieve exactly this, since such a condition would allow for dissection  
514 of functionalities. The stoichiometry of native kinetochores (each thought to contain two Ctf19c  
515 assemblies (Hinshaw & Harrison, 2019, Yan et al., 2019)) is not recapitulated in single sgRNA-  
516 based targeting, which might explain lower suppression strength. Indeed, engineering a dCas9-  
517 molecule with two Ctf19 NH<sub>2</sub> moieties enhanced suppression strength (**Figure 5C and D**),  
518 suggesting that stoichiometry of kinetochore factors is important for crossover regulation. In  
519 addition, certain regulatory aspects encoded in non-Ctf19 subunits of the kinetochore might  
520 collaborate with the ‘Ctf19-pathway’ in mediating crossover suppression. Indeed, it is known  
521 that DDK is recruited to native kinetochores via Ctf3, and that kinetochore-association of DDK  
522 is required for efficient phosphorylation of Ctf19 (Hinshaw et al., 2017). This aspect of  
523 kinetochore function is likely not recapitulated in Ctf19-targeted situations. Direct fusion of Dbf4  
524 to Ctf19-dCas9 led to increased crossover suppression, likely caused by more efficient  
525 phosphorylation of Ctf19 (**Figure 5H and I**). Furthermore, recent work has demonstrated that  
526 pericentromeres adopt a specialized 3D confirmation, coordinately driven by local gene  
527 organization and kinetochores (Paldi et al., 2019). Pericentromeric 3D organization might play a  
528 role in local crossover regulation, and it is conceivable that the ectopic sites we study here do not

529 exhibit optimal gene organization to allow efficient formation of such a chromosome  
530 architecture.

531 Third, we do not currently know the efficiency and variability of dCas9-mediated targeting in  
532 individual cells. It is possible that a subpopulation of cells fails to efficiently recruit dCas9-fusion  
533 constructs, which could result in less efficient overall suppression frequencies.

534         Methods that allow for specific targeting of individual components of chromosomal  
535 regulatory system to ectopic sites (in isolation from native binding partners or complexes) are  
536 useful tools to interrogate and dissect functional contributions (for example, see (Gascoigne et  
537 al., 2011, Ho et al., 2014, Kiermaier et al., 2009, Lacefield et al., 2009)). To our knowledge, we  
538 are the first to use of dCas9-technology to establish such a method, and use this approach to  
539 locally manipulate crossover formation via the targeted recruitment of specific factors. The  
540 method that we developed here should be readily adaptable to allow the investigation and  
541 manipulation of other aspects of (meiotic and/or mitotic) chromosome biology. We note that  
542 modulating crossover frequencies is a major engineering goal in crop development (Choi, 2017,  
543 et al., 2017). Our approach could provide a basis to explore local manipulation of meiotic  
544 recombination in plant breeding while eliminating the need for mutation of the genetic region of  
545 interest. Finally, combining the current system with the expanding repertoire of Cas9-versions  
546 and mutants (Knott & Doudna, 2018) should facilitate multiplex targeting and enquiry of  
547 complex phenotypic behaviors. For example, in case of the specific phenotype we studied here,  
548 targeting multiple kinetochore/Ctf19c subunits to adjacent loci should allow for more complete  
549 reconstitution and interrogation of kinetochore-driven regulation of DSB suppression and  
550 crossover repair control.

551



## 552 **Acknowledgements**

553 We thank the Vader and Bird (Max Planck Institute of Molecular Physiology,  
554 Dortmund, Germany) laboratories for ideas and helpful discussions. We thank Richard Cardoso  
555 da Silva (Max Planck Institute of Molecular Physiology, Dortmund, Germany) for mapping  
556 Spo11-oligo datasets. We acknowledge Andrea Musacchio (Max Planck Institute of Molecular  
557 Physiology, Dortmund, Germany) for ongoing support. We thank Stephen Hinshaw (Harvard  
558 Medical School, Boston, USA) for comments on the manuscript and for sharing illustrations  
559 depicting the structural organization of the budding yeast kinetochore. We thank John Weir  
560 (Friedrich Miescher Laboratory, Tübingen, Germany) and Vivek B. Raina (Max Planck  
561 Institute of Molecular Physiology, Dortmund, Germany) for comments on the manuscript.  
562 Work in the Vader laboratory was financially supported by the European Research Council  
563 (ERC Starting Grant URDNA, agreement nr. [638197], to G.V.) and the Max Planck Society.  
564 Work in the Marston laboratory was funded by a Wellcome Senior Research Fellowship  
565 [107827] and core funding for the Wellcome Centre for Cell biology [203149]. A.N.V.  
566 acknowledges support from INSPIRE, Department of Science and Technology (DST),  
567 Government of India, and from the Department of Biological Sciences, IISER Kolkata, India.

568

## 569 **Author contribution**

570 L-M.K., G.V., V.M and A.L.M. conceived and designed experiments. L-M.K., V.M.,  
571 S.R., A.N.V, and G.V. performed experiments. G.V. and A.L.M. supervised the study. G.V.  
572 wrote the manuscript with input from all authors.

573

574

575 **Figure legends**

576 **Figure 1. a dCas9/CRISPR-based targeting system.** **A.** Schematic of dCas9-based fusion  
577 protein used in this study. Note that the 3xFlag moiety also functions as a peptide linker in  
578 between kinetochore factor of interest and dCas9. **B.** Schematic of fusion construct design. **C.**  
579 Western blot analysis of expression of 3xFlag-dCas9 during meiotic G2/prophase at defined  
580 hours after induction into the meiotic program. Pgk1 was used as a loading control. **D.**  
581 Schematic of live cell reporter assay on the right arm of Chromosome *VIII*. See Material and  
582 Methods for more information. **E.** Schematic of meiotic recombination, chromosome  
583 segregation and assortment of chromosomes in haploid gametes, yielding differentially  
584 fluorescent behaviors that report on recombination frequencies. **F.** Example of three tetrads  
585 from a meiotic culture with the described live cell reporter. Cells I. and II. are parental ditype,  
586 III. is tetratype. No rec.= no recombination, rec.=recombination. **G.** ChIP-qPCR ( $\alpha$ -Flag ChIP)  
587 analysis of *CEN3*/Chr. *III*/Chr.*VIII* regions in yeast strains expressing 3xFlag-dCas9 in  
588 combination with sgRNA ‘*mock*’, ‘*III*’ and ‘*VIII*’ during meiotic G2/prophase (5 hours).  
589 Primers pairs used for *CEN3*: GV2569/G2570, *III*: GV2464/GV2465, *VIII*: GV2472/GV2473.  
590 **H.** Map distances in centiMorgans (cM) and standard error determined for chromosomal arm  
591 interval as described in Materials and Methods and depicted in **D**. Data are from (Vincenten et  
592 al., 2015) and for 3xFlag-dCas9 in combination with sgRNAs ‘*mock*’, ‘*III*’ and ‘*VIII*’, as  
593 indicated. p-values were obtained using Fisher’s exact test (n.s. (non-significant)  $\geq 0.05$ , \*  
594  $p < 0.05$ ; \*\*  $p < 0.0001$ ).

595 **Figure 2. dCas9/CRISPR-based targeting reveals a role for Ctf19 in crossover control.** **A.**  
596 Schematic of the budding yeast kinetochore, adapted from (Hinshaw & Harrison, 2019). The  
597 investigated kinetochore subcomplexes are highlighted. Individual factors that were used as  
598 dCas9-fusion are indicated in bold. **B.** Western blot analysis of expression of indicated

599 3xFLAG-dCas9 fusion constructs during meiotic G2/prophase (5 hours). Pgk1 was used as a  
600 loading control. **C.** Map distances in centiMorgans (cM) and standard error determined for  
601 chromosomal arm interval in cells expressing indicated 3xFLAG-dCas9 fusion constructs and  
602 ‘VIII’ sgRNA. p-values were obtained using Fisher’s exact test (n.s. (non-significant)  $\geq 0.05$ , \*  
603  $p < 0.05$ ; \*\*  $p < 0.0001$ ). **D.** Map distances in centiMorgans (cM) and standard error determined  
604 for chromosomal arm interval in cells expressing indicated 3xFLAG-dCas9 fusion constructs  
605 and ‘mock’, ‘III’, or ‘VIII’ sgRNAs. p-values were obtained using Fisher’s exact test (n.s. (non-  
606 significant)  $\geq 0.05$ , \*  $p < 0.05$ ; \*\*  $p < 0.0001$ ).

607 **Figure 3. Dissection of Ctf19-dependent crossover control.** **A.** Schematic of the budding  
608 yeast kinetochore, adapted from (Hinshaw & Harrison, 2019), indicating effects of Ctf19-  
609 targeting on chromosome arm interval (*i.e.* co-targeting of binding partners and functional  
610 requirement). **B.** Co-immunoprecipitation of Ctf19-3xFlag-dCas9 and Mcm21-3HA (via  $\alpha$ -  
611 Flag IP) during meiotic prophase (5 hours into meiotic program). Pgk1 and Histone H3 are used  
612 as loading control. **C.** ChIP-qPCR ( $\alpha$ -HA ChIP) analysis of *CEN3*/Chr. *III*/Chr. *VIII* regions  
613 in yeast strains expressing indicated factors (5 hours). Primers pairs used for *CEN3*:  
614 GV2569/G2570, *III*: GV2464/GV2465, *VIII*: GV2472/GV2473. **D.** Co-immunoprecipitation  
615 of Ctf19-3xFlag-dCas9 and Chl4-6HA (via  $\alpha$ -Flag IP) during meiotic prophase (5 hours into  
616 meiotic program). Pgk1 and Histone H3 are used as loading control. **E.** ChIP-qPCR ( $\alpha$ -HA  
617 ChIP) analysis of *CEN3*/Chr. *III*/Chr. *VIII* regions in yeast strains expressing indicated factors  
618 (5 hours). Primers pairs used for *CEN3*: GV2569/G2570, *III*: GV2464/GV2465, *VIII*:  
619 GV2472/GV2473. **F.** Map distances in centiMorgans (cM) and standard error determined for  
620 chromosomal arm interval in *iml3Δ* cells expressing indicated 3xFLAG-dCas9 fusion  
621 constructs and ‘VIII’ sgRNA. p-values were obtained using Fisher’s exact test (n.s. (non-  
622 significant)  $\geq 0.05$ , \*  $p < 0.05$ ; \*\*  $p < 0.0001$ ). **G.** Western blot analysis of expression of indicated

623 3xFLAG-dCas9 fusion constructs in *iml3Δ* cells during meiotic G2/prophase (5 hours), as used  
624 in **F**.

625 **Figure 4. Phosphorylation of the NH<sub>2</sub>-terminus of Ctf19-dependent drives crossover**  
626 **control. A.** Schematic of the budding yeast kinetochore, adapted from (Hinshaw & Harrison,  
627 2019), indicating the molecular connection between DDK, the NH<sub>2</sub>-terminus of Ctf19,  
628 Scc2/Scc4 and cohesin function. **B.** Map distances in centiMorgans (cM) and standard error  
629 determined for chromosomal arm interval in cells expressing indicated 3xFLAG-dCas9 fusion  
630 constructs and ‘VIII’ sgRNA. p-values were obtained using Fisher’s exact test (n.s. (non-  
631 significant)  $\geq 0.05$ , \*  $p < 0.05$ ; \*\*  $p < 0.0001$ ). **C.** Western blot analysis of expression of indicated  
632 3xFLAG-dCas9 fusion constructs cells during meiotic G2/prophase (5 hours), as used in **B**. **D.**  
633 Co-immunoprecipitation of Ctf19-3xFlag-dCas9, Ctf19-9A-3xFlag-dCas9 and Mcm21-3HA  
634 (via  $\alpha$ -Flag IP) during meiotic prophase (5 hours into meiotic program). Pgc1 and Histone H3  
635 are used as loading control. **E.** Schematic of Ctf19<sub>1-30</sub>-3xFlag-dCas9. **F.** Map distances in  
636 centiMorgans (cM) and standard error determined for chromosomal arm interval in cells  
637 expressing indicated 3xFLAG-dCas9 fusion constructs and ‘VIII’ sgRNA. p-values were  
638 obtained using Fisher’s exact test (n.s. (non-significant)  $\geq 0.05$ , \*  $p < 0.05$ ; \*\*  $p < 0.0001$ ). **G.**  
639 Western blot analysis of expression of indicated 3xFLAG-dCas9 fusion constructs cells during  
640 meiotic G2/prophase (5 hours), as used in **F**.

641 **Figure 5. Manipulating Ctf19-dependent crossover strength. A.** Schematic of the budding  
642 yeast kinetochore, adapted from (Hinshaw & Harrison, 2019), indicating the ‘dimeric’ nature  
643 of Ctf19c within the kinetochore, and the role of Ctf3 in DDK recruitment. **B.** Schematic of  
644 Ctf19<sub>1-30(2x)</sub>-3xFlag-dCas9. 6xG indicates 6xGlycine present between the two Ctf19 moieties.  
645 **C.** Map distances in centiMorgans (cM) and standard error determined for chromosomal arm  
646 interval in cells expressing indicated 3xFLAG-dCas9 fusion constructs and ‘VIII’ sgRNA. p-

647 values were obtained using Fisher's exact test (n.s. (non-significant)  $\geq 0.05$ , \*  $p < 0.05$ ; \*\*  
648  $p < 0.0001$ ). **D.** Western blot analysis of expression of indicated 3xFLAG-dCas9 fusion  
649 constructs cells during meiotic G2/prophase (5 hours), as used in **C.** **E.** Map distances in  
650 centiMorgans (cM) and standard error determined for chromosomal arm interval in cells  
651 expressing Ctf19<sub>1-30(2x)</sub>-3xFlag-dCas9 and 'VIII' sgRNA in *MCM21* or *mcm21Δ* cells. p-values  
652 were obtained using Fisher's exact test (n.s. (non-significant)  $\geq 0.05$ , \*  $p < 0.05$ ; \*\*  $p < 0.0001$ ).  
653 **F.** Western blot analysis of expression of ctf19<sub>1-30(2x)</sub>-3xFlag-dCas9 in cells *MCM21* or *mcm21Δ*  
654 cells during meiotic G2/prophase (5 hours), as used in **E.** **G.** Schematic of Ctf19-3xFlag-dCas9-  
655 Dbf4. 6xG indicates 6xGlycine present between the dCas9 and Dbf4. **H.** Map distances in  
656 centiMorgans (cM) and standard error determined for chromosomal arm interval in cells  
657 expressing indicated 3xFLAG-dCas9 fusion constructs and 'VIII' sgRNA. p-values were  
658 obtained using Fisher's exact test (n.s. (non-significant)  $\geq 0.05$ , \*  $p < 0.05$ ; \*\*  $p < 0.0001$ ). **I.**  
659 Western blot analysis of expression of indicated 3xFLAG-dCas9 fusion constructs cells during  
660 meiotic G2/prophase (5 hours), as used in **H.**

661 **Figure 6. DSBs are not affected by dCas9-dependent targeting of Ctf19 fusions. A.**  
662 Schematic of the genomic region around the 'YCR047C' DSB hotspot on Chromosome III.  
663 SGD coordinates for binding of sgRNA 'III' are indicated. Representative genome browser  
664 profile of meiotic hotspots for Spo11-oligo mapping (Zhu & Keeney, 2015). Normalized Spo11  
665 oligo counts (RPM) is shown. **B.** Southern blot of YCR047C DSB hotspot, in yeast expressing  
666 the indicated dCas9 constructs and the sgRNA 'III'. Time into the meiotic time course are  
667 indicated. Note that the *sae2Δ* background was used to prevent DSB resection and repair. **C.**  
668 Quantification of **B.** Error bars indicated standard error of the mean from three experiments.

669 **Figure 7. The DDK-Ctf19-Scc2/4-cohesin pathway affects pericentromeric crossover**  
670 **suppression. A.** Map distances in centiMorgans (cM) and standard error determined for a

671 pericentromeric (left panel) and chromosomal arm (right panel) intervals in wild type, *ctf19-9A*  
672 and *ctf19Δ* cells. p-values were obtained using Fisher's exact test (n.s. (non-significant)  $\geq 0.05$ ,  
673 \*  $p < 0.05$ ; \*\*  $p < 0.0001$ ).

674

## 675 **References**

- 676 Blitzblau HG, Bell GW, Rodriguez J, Bell SP, Hochwagen A (2007) Mapping of meiotic single-  
677 stranded DNA reveals double-stranded-break hotspots near centromeres and telomeres. *Current*  
678 *biology : CB* 17: 2003-12
- 679 Borde V, Wu TC, Lichten M (1999) Use of a recombination reporter insert to define meiotic  
680 recombination domains on chromosome III of *Saccharomyces cerevisiae*. *Molecular and*  
681 *cellular biology* 19: 4832-42
- 682 Buhler C, Borde V, Lichten M (2007) Mapping meiotic single-strand DNA reveals a new  
683 landscape of DNA double-strand breaks in *Saccharomyces cerevisiae*. *PLoS biology* 5: e324
- 684 Centola M, Carbon J (1994) Cloning and characterization of centromeric DNA from  
685 *Neurospora crassa*. *Molecular and cellular biology* 14: 1510-9
- 686 Cheeseman IM, Desai A (2008) Molecular architecture of the kinetochore-microtubule  
687 interface. *Nature reviews Molecular cell biology* 9: 33-46
- 688 Choi K (2017) Advances towards Controlling Meiotic Recombination for Plant Breeding. *Mol*  
689 *Cells* 40: 814-822
- 690 Copenhaver GP, Nickel K, Kuromori T, Benito MI, Kaul S, Lin X, Bevan M, Murphy G, Harris  
691 B, Parnell LD, McCombie WR, Martienssen RA, Marra M, Preuss D (1999) Genetic definition  
692 and sequence analysis of *Arabidopsis* centromeres. *Science* 286: 2468-74
- 693 Davidson IF, Bauer B, Goetz D, Tang W, Wutz G, Peters JM (2019) DNA loop extrusion by  
694 human cohesin. *Science* 366: 1338-1345
- 695 De Wulf P, McAinsh AD, Sorger PK (2003) Hierarchical assembly of the budding yeast  
696 kinetochore from multiple subcomplexes. *Genes & development* 17: 2902-21
- 697 Ellermeier C, Higuchi EC, Phadnis N, Holm L, Geelhood JL, Thon G, Smith GR (2010) RNAi  
698 and heterochromatin repress centromeric meiotic recombination. *Proceedings of the National*  
699 *Academy of Sciences of the United States of America* 107: 8701-5
- 700 Fernius J, Marston AL (2009) Establishment of cohesion at the pericentromere by the Ctf19  
701 kinetochore subcomplex and the replication fork-associated factor, Csm3. *PLoS genetics* 5:  
702 e1000629
- 703 Fujita T, Yuno M, Fujii H (2018) An enChIP system for the analysis of bacterial genome  
704 functions. *BMC Res Notes* 11: 387
- 705 Gascoigne KE, Takeuchi K, Suzuki A, Hori T, Fukagawa T, Cheeseman IM (2011) Induced  
706 ectopic kinetochore assembly bypasses the requirement for CENP-A nucleosomes. *Cell* 145:  
707 410-22
- 708 Gerton JL, DeRisi J, Shroff R, Lichten M, Brown PO, Petes TD (2000) Inaugural article: global  
709 mapping of meiotic recombination hotspots and coldspots in the yeast *Saccharomyces*  
710 *cerevisiae*. *Proceedings of the National Academy of Sciences of the United States of America*  
711 97: 11383-90
- 712 Gilbert LA, Larson MH, Morsut L, Liu Z, Brar GA, Torres SE, Stern-Ginossar N, Brandman  
713 O, Whitehead EH, Doudna JA, Lim WA, Weissman JS, Qi LS (2013) CRISPR-mediated  
714 modular RNA-guided regulation of transcription in eukaryotes. *Cell* 154: 442-51
- 715 Gore MA, Chia JM, Elshire RJ, Sun Q, Ersoz ES, Hurwitz BL, Peiffer JA, McMullen MD,  
716 Grills GS, Ross-Ibarra J, Ware DH, Buckler ES (2009) A first-generation haplotype map of  
717 maize. *Science* 326: 1115-7
- 718 Gutierrez-Escribano P, Newton MD, Llauro A, Huber J, Tanasie L, Davy J, Aly I, Aramayo R,  
719 Montoya A, Kramer H, Stigler J, Rueda DS, Aragon L (2019) A conserved ATP- and Scc2/4-  
720 dependent activity for cohesin in tethering DNA molecules. *Sci Adv* 5: eaay6804
- 721 Hassold T, Hunt P (2001) To err (meiotically) is human: the genesis of human aneuploidy. *Nat*  
722 *Rev Genet* 2: 280-91



- 723 Hinshaw SM, Harrison SC (2019) The structure of the Ctf19c/CCAN from budding yeast. *eLife*  
724 8
- 725 Hinshaw SM, Makrantoni V, Harrison SC, Marston AL (2017) The Kinetochores Receptor for  
726 the Cohesin Loading Complex. *Cell* 171: 72-84 e13
- 727 Hinshaw SM, Makrantoni V, Kerr A, Marston AL, Harrison SC (2015) Structural evidence for  
728 Scc4-dependent localization of cohesin loading. *eLife* 4: e06057
- 729 Ho KH, Tsuchiya D, Oliger AC, Lacefield S (2014) Localization and function of budding yeast  
730 CENP-A depends upon kinetochore protein interactions and is independent of canonical  
731 centromere sequence. *Cell reports* 9: 2027-33
- 732 Hunter N (2015) Meiotic Recombination: The Essence of Heredity. *Cold Spring Harbor*  
733 *perspectives in biology* 7
- 734 Keeney S (2001) Mechanism and control of meiotic recombination initiation. *Curr Top Dev*  
735 *Biol* 52: 1-53
- 736 Kiermaier E, Woehrer S, Peng Y, Mechtler K, Westermann S (2009) A Dam1-based artificial  
737 kinetochore is sufficient to promote chromosome segregation in budding yeast. *Nature cell*  
738 *biology* 11: 1109-15
- 739 Kim KP, Weiner BM, Zhang L, Jordan A, Dekker J, Kleckner N (2010) Sister cohesion and  
740 structural axis components mediate homolog bias of meiotic recombination. *Cell* 143: 924-37
- 741 Knott GJ, Doudna JA (2018) CRISPR-Cas guides the future of genetic engineering. *Science*  
742 361: 866-869
- 743 Koehler KE, Hawley RS, Sherman S, Hassold T (1996) Recombination and nondisjunction in  
744 humans and flies. *Hum Mol Genet* 5 Spec No: 1495-504
- 745 Kuhl LM, Vader G (2019) Kinetochores, cohesin, and DNA breaks: Controlling meiotic  
746 recombination within pericentromeres. *Yeast* 36: 121-127
- 747 Lacefield S, Lau DT, Murray AW (2009) Recruiting a microtubule-binding complex to DNA  
748 directs chromosome segregation in budding yeast. *Nature cell biology* 11: 1116-20
- 749 Lamb NE, Sherman SL, Hassold TJ (2005) Effect of meiotic recombination on the production  
750 of aneuploid gametes in humans. *Cytogenet Genome Res* 111: 250-5
- 751 Lambie EJ, Roeder GS (1988) A yeast centromere acts in cis to inhibit meiotic gene conversion  
752 of adjacent sequences. *Cell* 52: 863-73
- 753 Lambing C, Franklin FC, Wang CR (2017) Understanding and Manipulating Meiotic  
754 Recombination in Plants. *Plant Physiol* 173: 1530-1542
- 755 Lang J, Barber A, Biggins S (2018) An assay for de novo kinetochore assembly reveals a key  
756 role for the CENP-T pathway in budding yeast. *eLife* 7
- 757 Laughery MF, Hunter T, Brown A, Hoopes J, Ostbye T, Shumaker T, Wyrick JJ (2015) New  
758 vectors for simple and streamlined CRISPR-Cas9 genome editing in *Saccharomyces cerevisiae*.  
759 *Yeast* 32: 711-20
- 760 Liu X, Zhang Y, Chen Y, Li M, Zhou F, Li K, Cao H, Ni M, Liu Y, Gu Z, Dickerson KE, Xie  
761 S, Hon GC, Xuan Z, Zhang MQ, Shao Z, Xu J (2017) In Situ Capture of Chromatin Interactions  
762 by Biotinylated dCas9. *Cell* 170: 1028-1043 e19
- 763 Mahtani MM, Willard HF (1998) Physical and genetic mapping of the human X chromosome  
764 centromere: repression of recombination. *Genome research* 8: 100-10
- 765 Murakami H, Keeney S (2014) Temporospatial coordination of meiotic DNA replication and  
766 recombination via DDK recruitment to replisomes. *Cell* 158: 861-873
- 767 Musacchio A, Desai A (2017) A Molecular View of Kinetochore Assembly and Function.  
768 *Biology (Basel)* 6
- 769 Nakaseko Y, Adachi Y, Funahashi S, Niwa O, Yanagida M (1986) Chromosome walking shows  
770 a highly homologous repetitive sequence present in all the centromere regions of fission yeast.  
771 *The EMBO journal* 5: 1011-21



- 772 Nambiar M, Smith GR (2018) Pericentromere-Specific Cohesin Complex Prevents Meiotic  
773 Pericentric DNA Double-Strand Breaks and Lethal Crossovers. *Molecular cell* 71: 540-553 e4  
774 Paldi F., Alver B., Robertson D., Schalbetter S.A., Kerr A., Kelly D.A., Neale M.J., Baxter J.,  
775 Marston A.L. (2019) Convergent genes shape budding yeast pericentromeres. *BioRxiv*  
776 Pan J, Sasaki M, Kniewel R, Murakami H, Blitzblau HG, Tischfield SE, Zhu X, Neale MJ,  
777 Jasin M, Socci ND, Hochwagen A, Keeney S (2011) A hierarchical combination of factors  
778 shapes the genome-wide topography of yeast meiotic recombination initiation. *Cell* 144: 719-  
779 31  
780 Pekgoz Altunkaya G, Malvezzi F, Demianova Z, Zimniak T, Litos G, Weissmann F, Mechtler  
781 K, Herzog F, Westermann S (2016) CCAN Assembly Configures Composite Binding  
782 Interfaces to Promote Cross-Linking of Ndc80 Complexes at the Kinetochores. *Current biology*  
783 : *CB* 26: 2370-8  
784 Petela NJ, Gligoris TG, Metson J, Lee BG, Voulgaris M, Hu B, Kikuchi S, Chapard C, Chen  
785 W, Rajendra E, Srinivisan M, Yu H, Lowe J, Nasmyth KA (2018) Scc2 Is a Potent Activator  
786 of Cohesin's ATPase that Promotes Loading by Binding Scc1 without Pds5. *Molecular cell* 70:  
787 1134-1148 e7  
788 Petronczki M, Siomos MF, Nasmyth K (2003) Un menage a quatre: the molecular biology of  
789 chromosome segregation in meiosis. *Cell* 112: 423-40  
790 Pot I, Measday V, Snydsman B, Cagney G, Fields S, Davis TN, Muller EG, Hieter P (2003)  
791 Chl4p and iml3p are two new members of the budding yeast outer kinetochore. *Molecular*  
792 *biology of the cell* 14: 460-76  
793 Puechberty J, Laurent AM, Gimenez S, Billault A, Brun-Laurent ME, Calenda A, Marcais B,  
794 Prades C, Ioannou P, Yurov Y, Roizes G (1999) Genetic and physical analyses of the  
795 centromeric and pericentromeric regions of human chromosome 5: recombination across 5cen.  
796 *Genomics* 56: 274-87  
797 Rockmill B, Voelkel-Meiman K, Roeder GS (2006) Centromere-proximal crossovers are  
798 associated with precocious separation of sister chromatids during meiosis in *Saccharomyces*  
799 *cerevisiae*. *Genetics* 174: 1745-54  
800 Saintenac C, Falque M, Martin OC, Paux E, Feuillet C, Sourdille P (2009) Detailed  
801 recombination studies along chromosome 3B provide new insights on crossover distribution in  
802 wheat (*Triticum aestivum* L.). *Genetics* 181: 393-403  
803 Sasaki M, Lange J, Keeney S (2010) Genome destabilization by homologous recombination in  
804 the germ line. *Nature reviews Molecular cell biology* 11: 182-95  
805 Schleiffer A, Maier M, Litos G, Lampert F, Hornung P, Mechtler K, Westermann S (2012)  
806 CENP-T proteins are conserved centromere receptors of the Ndc80 complex. *Nature cell*  
807 *biology* 14: 604-13  
808 Schmitzberger F, Harrison SC (2012) RWD domain: a recurring module in kinetochore  
809 architecture shown by a Ctf19-Mcm21 complex structure. *EMBO Rep* 13: 216-22  
810 Schmitzberger F, Richter MM, Gordiyenko Y, Robinson CV, Dadlez M, Westermann S (2017)  
811 Molecular basis for inner kinetochore configuration through RWD domain-peptide interactions.  
812 *The EMBO journal* 36: 3458-3482  
813 Takahashi TS, Basu A, Bermudez V, Hurwitz J, Walter JC (2008) Cdc7-Drf1 kinase links  
814 chromosome cohesion to the initiation of DNA replication in *Xenopus* egg extracts. *Genes &*  
815 *development* 22: 1894-905  
816 Thacker D, Lam I, Knop M, Keeney S (2011) Exploiting spore-autonomous fluorescent protein  
817 expression to quantify meiotic chromosome behaviors in *Saccharomyces cerevisiae*. *Genetics*  
818 189: 423-39  
819 Vader G, Blitzblau HG, Tame MA, Falk JE, Curtin L, Hochwagen A (2011) Protection of  
820 repetitive DNA borders from self-induced meiotic instability. *Nature* 477: 115-9

- 821 Vershon AK, Hollingsworth NM, Johnson AD (1992) Meiotic induction of the yeast HOP1  
822 gene is controlled by positive and negative regulatory sites. *Molecular and cellular biology* 12:  
823 3706-14
- 824 Vincenten N, Kuhl LM, Lam I, Oke A, Kerr AR, Hochwagen A, Fung J, Keeney S, Vader G,  
825 Marston AL (2015) The kinetochore prevents centromere-proximal crossover recombination  
826 during meiosis. *eLife* 4
- 827 Wang H, La Russa M, Qi LS (2016) CRISPR/Cas9 in Genome Editing and Beyond. *Annu Rev*  
828 *Biochem* 85: 227-64
- 829 Westphal T, Reuter G (2002) Recombinogenic effects of suppressors of position-effect  
830 variegation in *Drosophila*. *Genetics* 160: 609-21
- 831 Xu X, Tao Y, Gao X, Zhang L, Li X, Zou W, Ruan K, Wang F, Xu GL, Hu R (2016) A CRISPR-  
832 based approach for targeted DNA demethylation. *Cell Discov* 2: 16009
- 833 Yan K, Yang J, Zhang Z, McLaughlin SH, Chang L, Fasci D, Ehrenhofer-Murray AE, Heck  
834 AJR, Barford D (2019) Structure of the inner kinetochore CCAN complex assembled onto a  
835 centromeric nucleosome. *Nature* 574: 278-282
- 836 Zhu X, Keeney S (2015) High-Resolution Global Analysis of the Influences of Bas1 and Ino4  
837 Transcription Factors on Meiotic DNA Break Distributions in *Saccharomyces cerevisiae*.  
838 *Genetics* 201: 525-42
- 839

# Figure 1

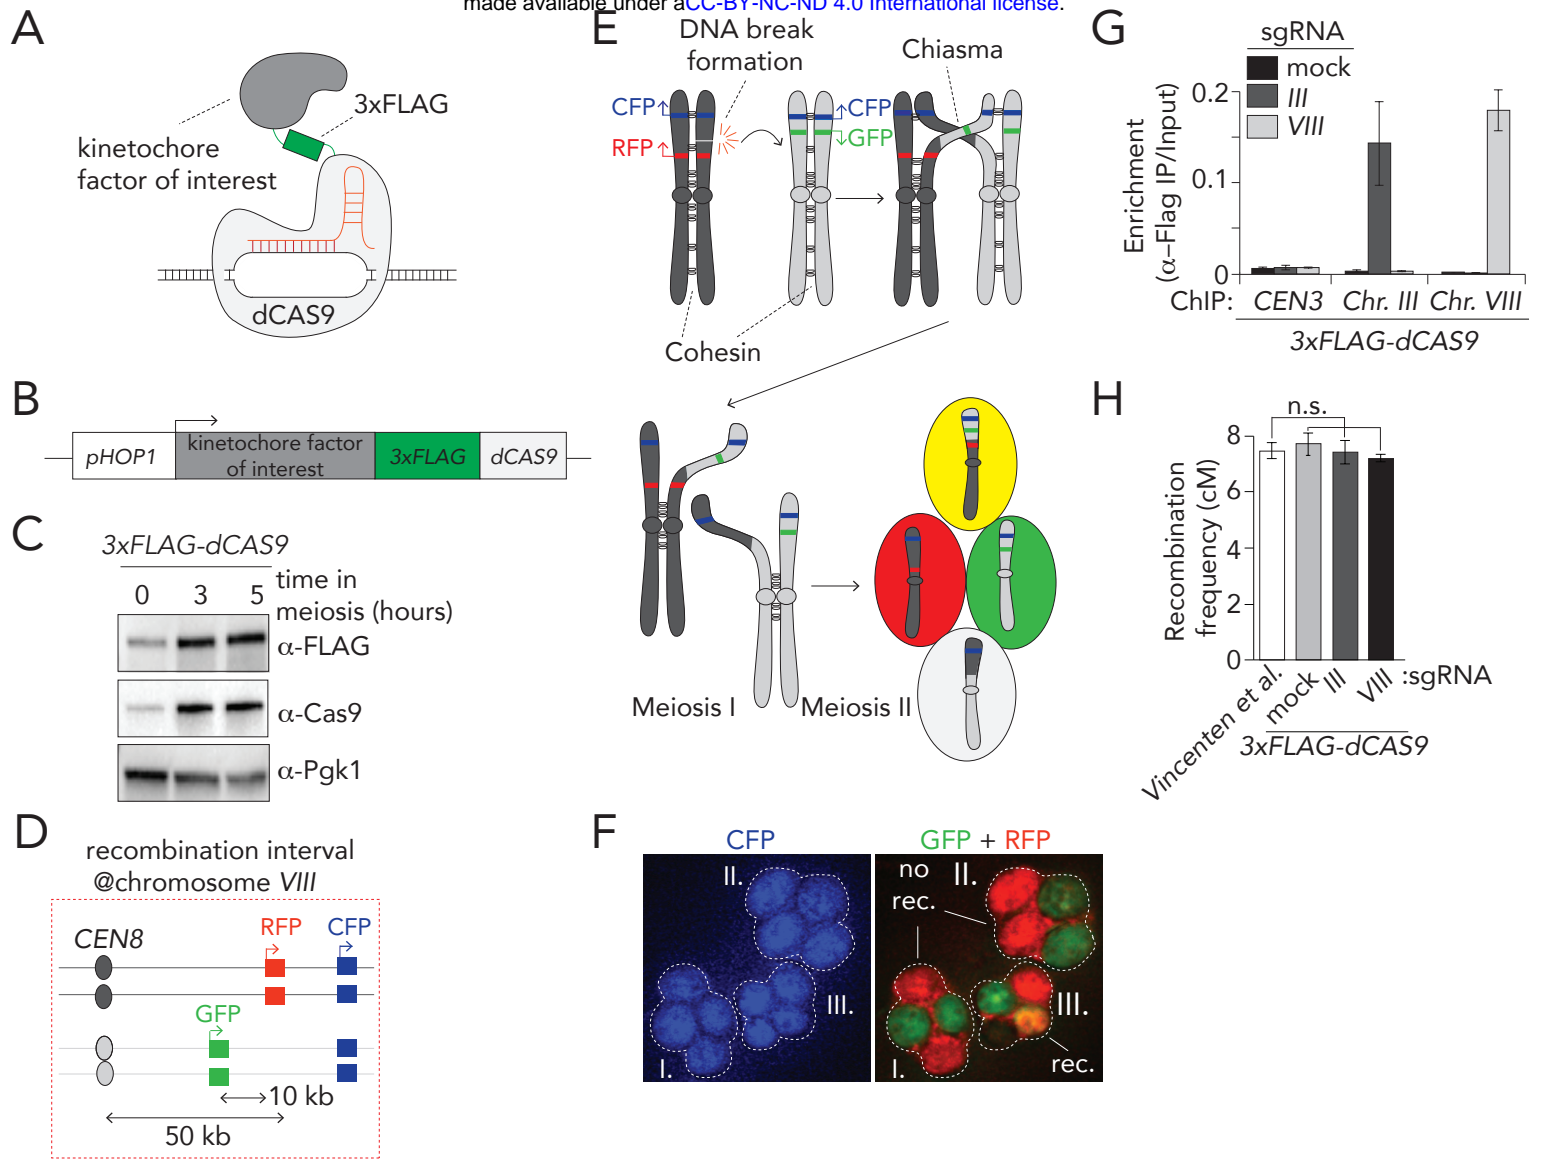

## Figure 2

A

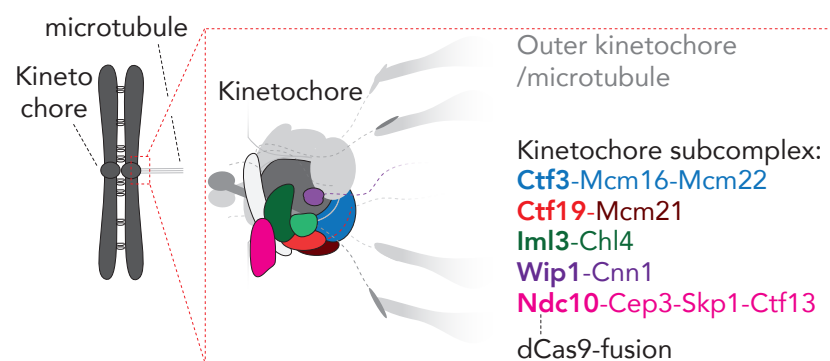

B

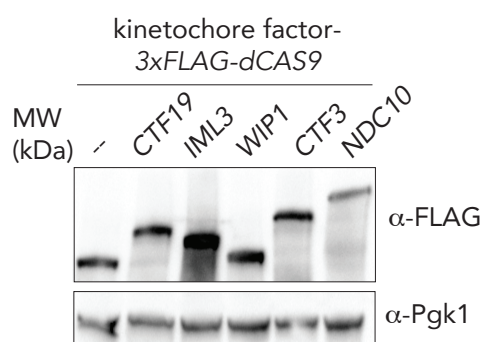

C

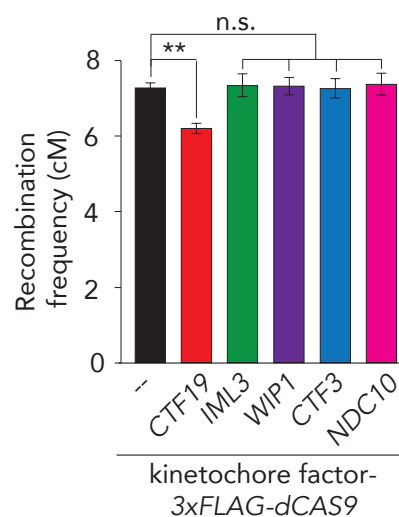

D

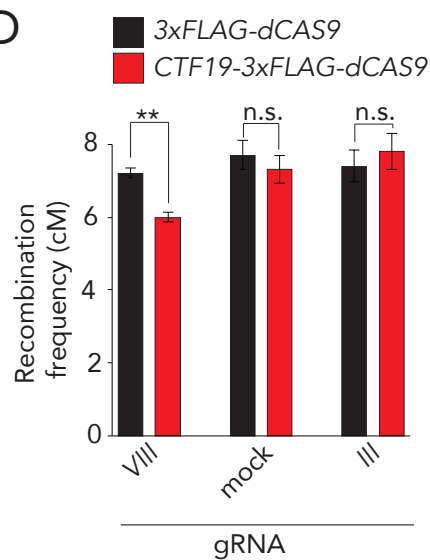

# Figure 3

A

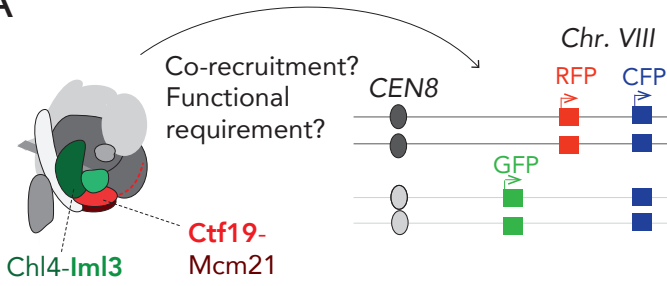

B

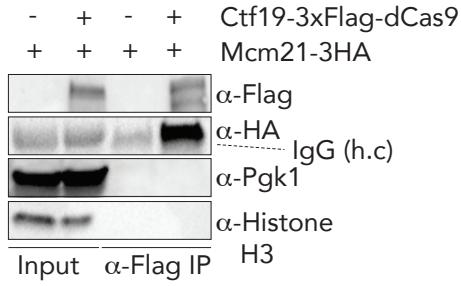

MW  
(kDa)

200-  
150-

C

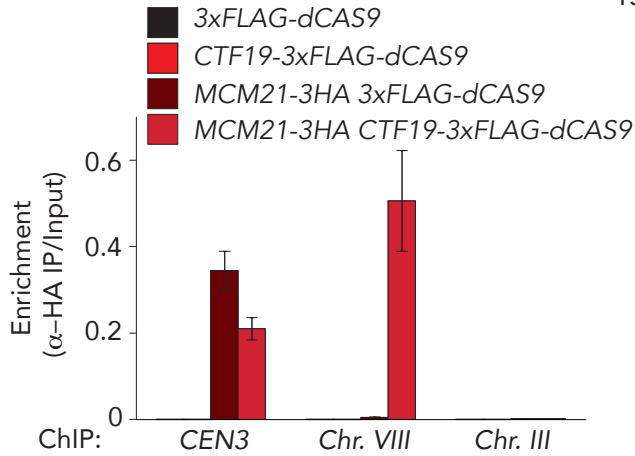

D

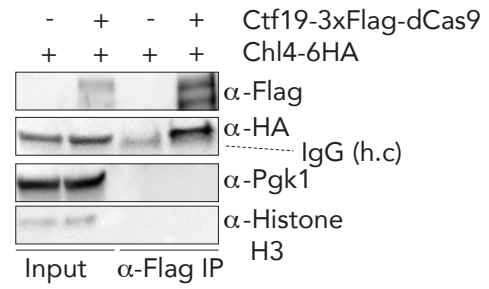

E

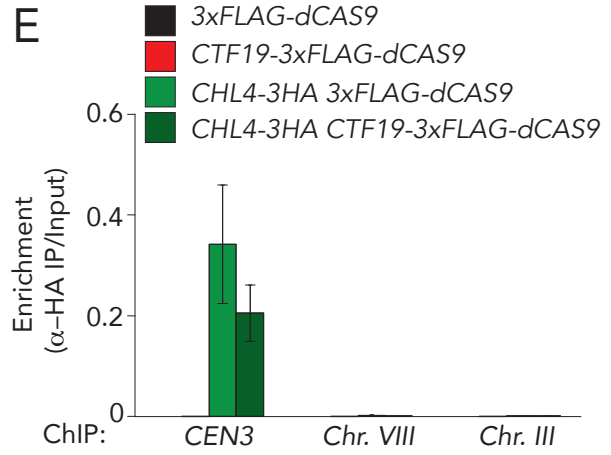

F

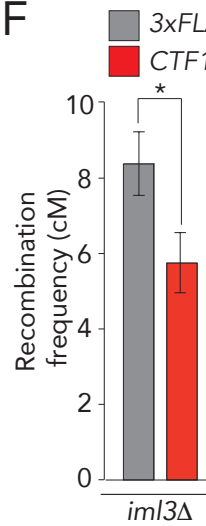

G

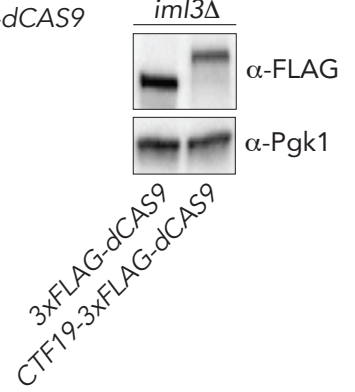

# Figure 4

**A**

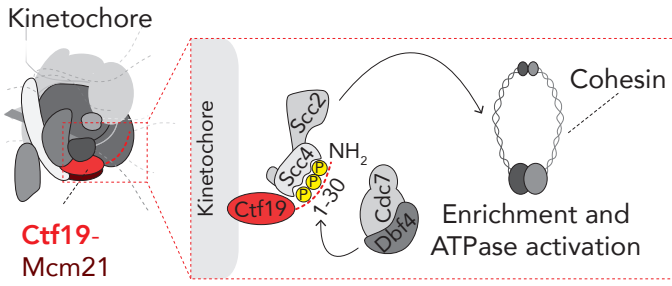

**E**

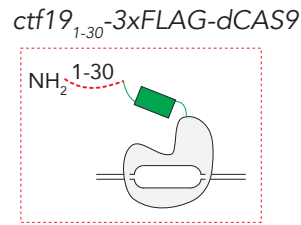

**B**

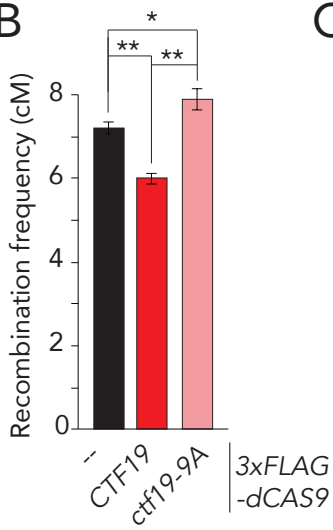

**C**

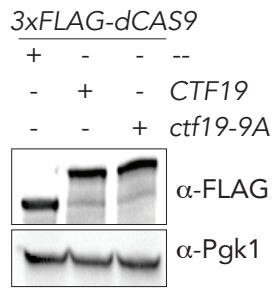

**F**

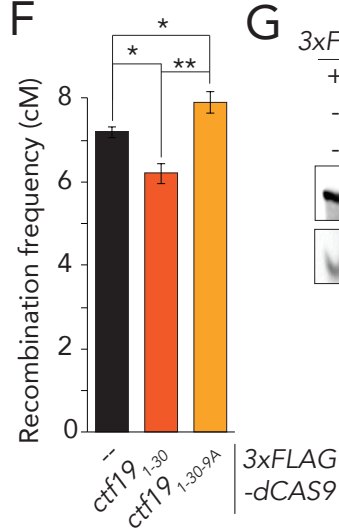

**G**

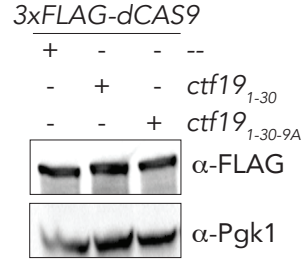

**D**

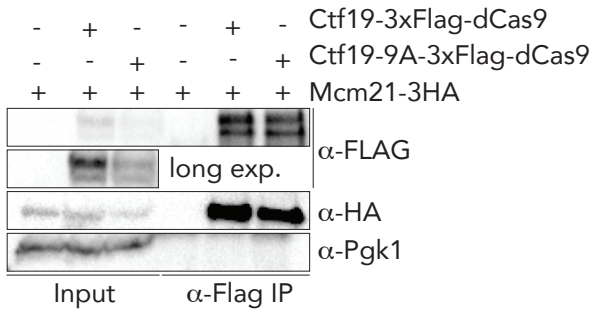

**H**

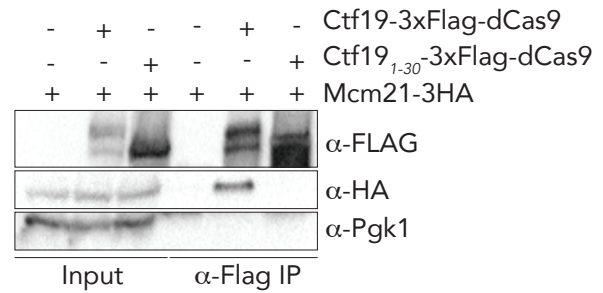

## Figure 5

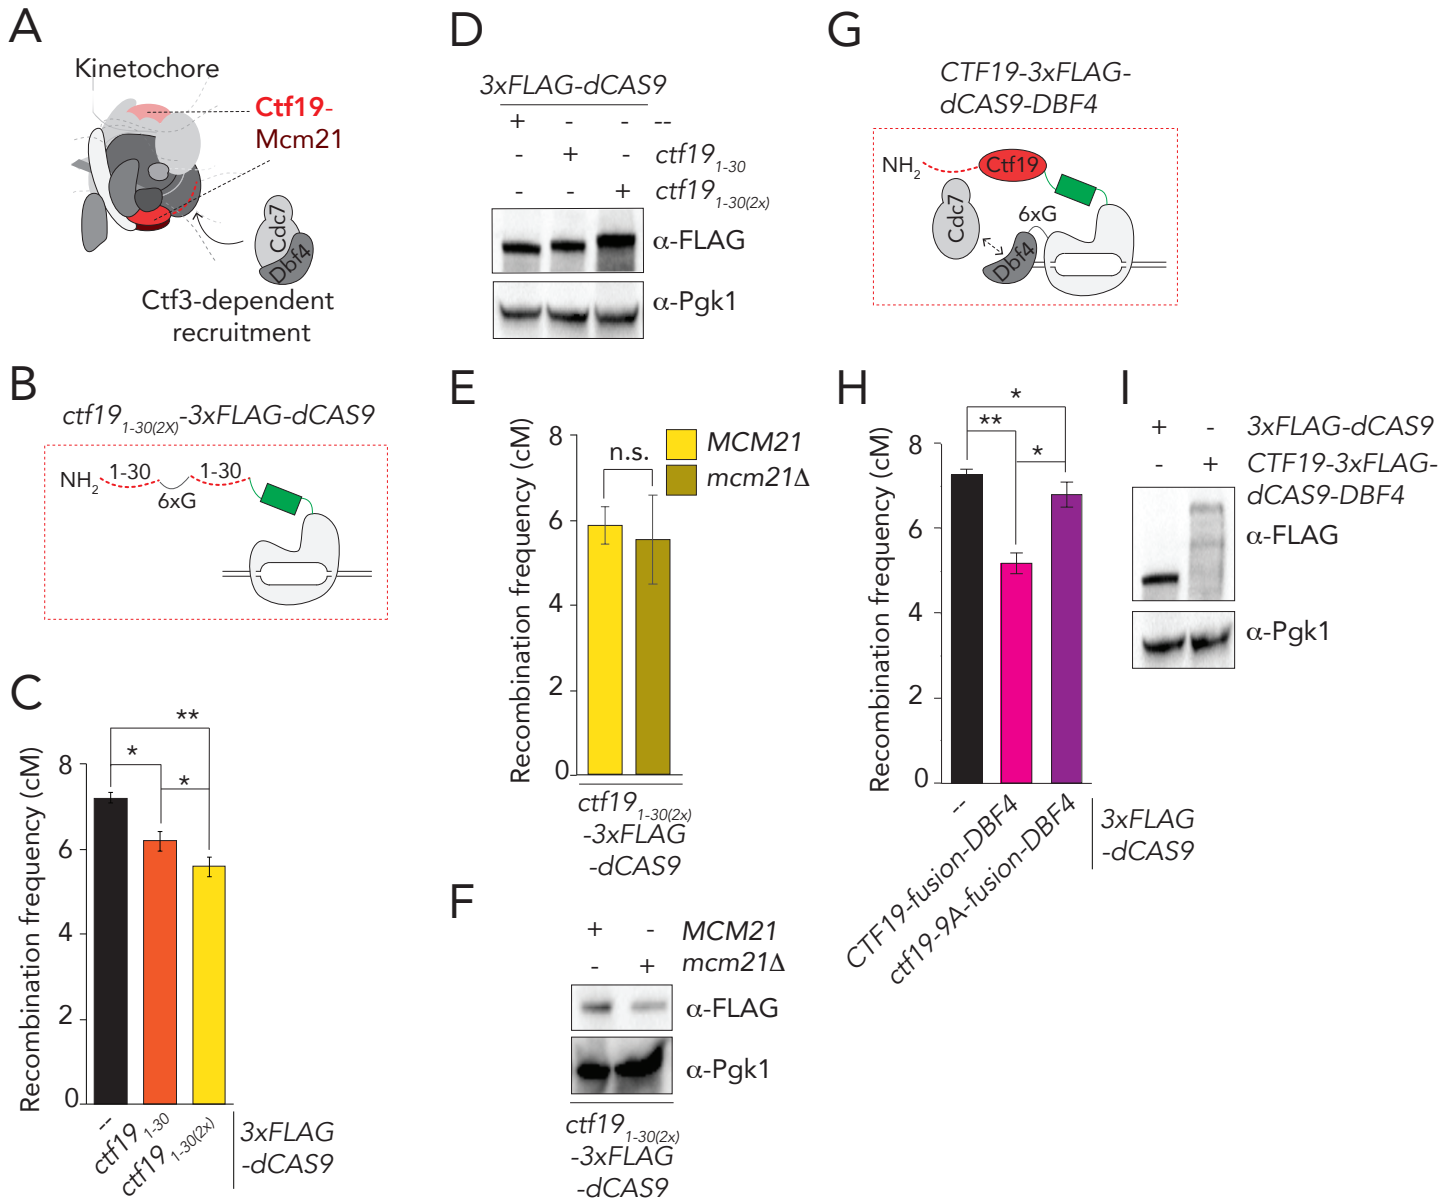

# Figure 6

A

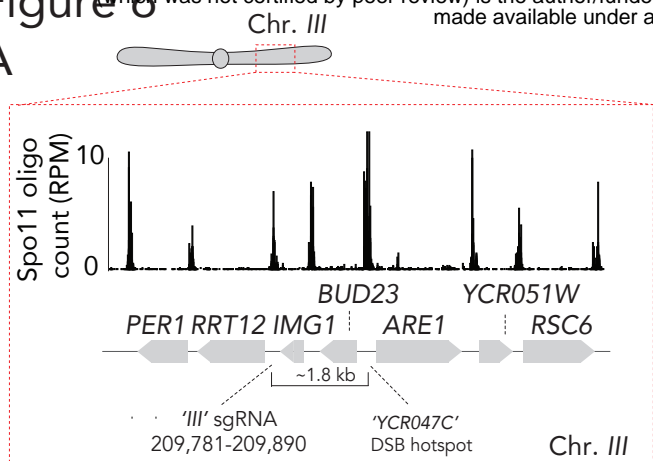

B

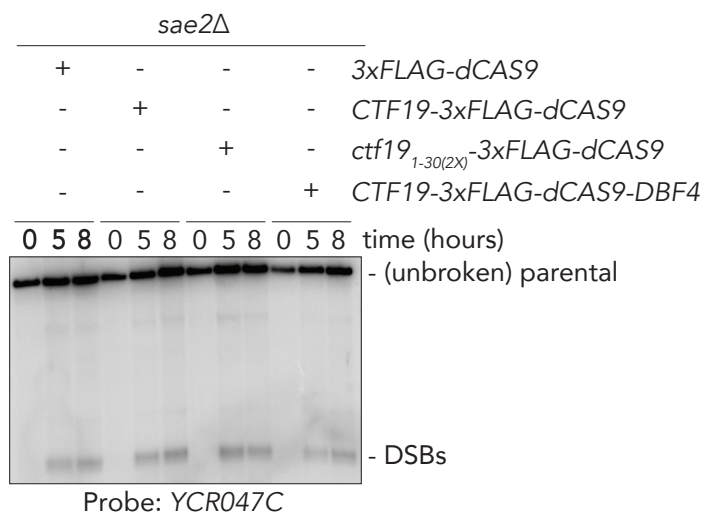

C

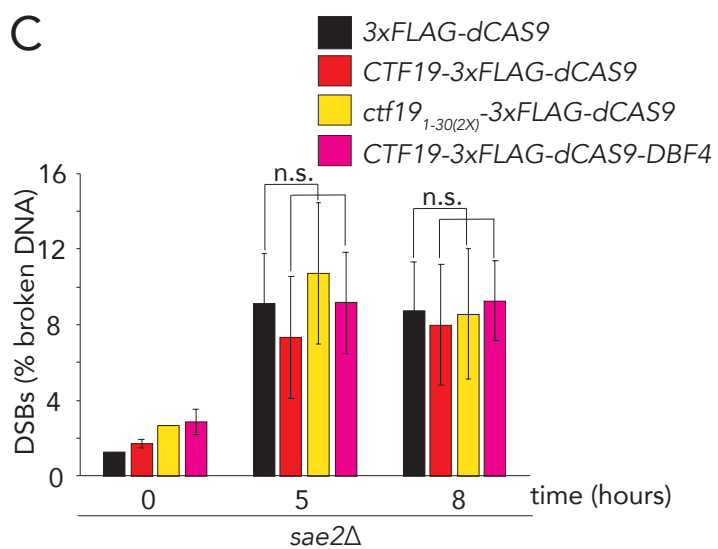



## Figure 7

A

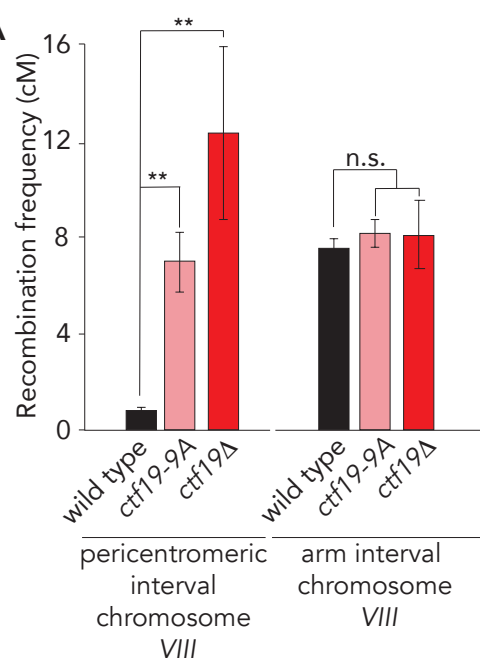

Source: https://www.biorxiv.org/content/10.1101/2020.04.07.030221v1.full.pdf
